1 **Word count:**

2 10240 (full document).

3

4 **Type of article:**

5 Original Article.

6

7 **Title:**

8 **Phylogeographic structure of the pygmy shrew: revisiting the roles of southern and**  
9 **northern refugia in Europe.**

10

11 **Authors:**

12 RODRIGO VEGA<sup>1\*</sup>, ALLAN D. MCDEVITT<sup>2</sup>, JOANNA STOJAK<sup>3</sup>, ALINA MISHTA<sup>4</sup>, JAN M.  
13 WÓJCIK<sup>3</sup>, BORIS KRYŠTUFEK<sup>5</sup> and JEREMY B. SEARLE<sup>6</sup>

14

15 **Affiliations:**

16 <sup>1</sup>*Ecology Research Group, Section of Life Sciences, School of Human and Life Sciences,*  
17 *Canterbury Christ Church University, Becket Bf23, North Holmes Road, Canterbury, Kent,*  
18 *CT1 1QU, UK.*

19 <sup>2</sup>*Ecosystems and Environment Research Centre, School of Science, Engineering and*  
20 *Environment, University of Salford, Salford, M5 4WT, UK.*

21 <sup>3</sup>*Mammal Research Institute, Polish Academy of Sciences, 17-230 Białowieża, Poland.*

22 <sup>4</sup>*Schmalhausen Institute of Zoology, National Academy of Sciences of Ukraine, 01601 Kiev,*  
23 *Ukraine.*

24 <sup>5</sup>*Slovenian Museum of Natural History, Prešernova 20, SI-1000 Ljubljana, Slovenia.*

25 <sup>6</sup>*Department of Ecology and Evolutionary Biology, Cornell University, Ithaca, New York,*  
26 *14853-2701, USA.*

27

28 \*Corresponding author. E-mail: [rodrigo.vega@canterbury.ac.uk](mailto:rodrigo.vega@canterbury.ac.uk)

1

2 **Running title:**

3 Phylogeography of the pygmy shrew.

4

1 **ABSTRACT**

2 Southern and northern glacial refugia are considered paradigms that explain the complex  
3 phylogeographic patterns and processes of European biota. Although the Eurasian pygmy  
4 shrew *Sorex minutus* Linnaeus, 1766 (Eulipotyphla, Soricidae) has been used a model  
5 species to study geographic isolation and genetic diversification in Mediterranean peninsulas  
6 in the Last Glacial Maximum (LGM), and post-glacial population expansion from cryptic  
7 northern glacial refugia in Western and Central Europe, there has been incomplete  
8 knowledge about the phylogeographic structure, genetic differentiation and demographic  
9 history within these regions. Here, we provide a revisited statistical phylogeographic study of  
10 *S. minutus* with greater sampling coverage in terms of numbers of individuals and  
11 geographic range, making it the most comprehensive investigation of this species to date.  
12 The results showed support for genetically distinct and diverse phylogeographic groups  
13 consistent with southern and northern glacial refugia, as expected from previous studies, but  
14 also identified geographical barriers concordant with glaciated mountain ranges during the  
15 LGM, early diversification events dated between the Upper Pleistocene and Lower Holocene  
16 for the main phylogeographic groups, and recent (post-LGM) patterns of demographic  
17 expansions. The results have implications for the conservation of intraspecific diversity and  
18 the preservation of the evolutionary potential of *S. minutus*.

19

20 **KEYWORDS:** Cytochrome b – glacial refugia – historical demography – Last Glacial  
21 Maximum – mammals – postglacial colonisation.

22

## 1 INTRODUCTION

2 During the Quaternary glaciations, species in Europe were restricted to glacial refugia at  
3 glacial maxima (Bilton *et al.*, 1998; Taberlet *et al.*, 1998; Hewitt, 2000; Stewart & Lister,  
4 2001; Pazonyi, 2004; Sommer & Nadachowski, 2006). As glaciers retreated, a broad range  
5 of recolonisation patterns emerged, as evidenced by palaeontological, biogeographic and  
6 phylogeographic studies on various taxa, resulting in the complex contemporary patterns of  
7 endemism, species richness and biodiversity hotspots observed across Europe. While  
8 population contraction and lineage diversification within southern glacial refugia in the  
9 Mediterranean peninsulas during the Last Glacial Maximum [LGM; 19-26.5 thousand years  
10 ago (KYA) (Clark *et al.*, 2009)], and subsequent northward postglacial recolonisation of  
11 Europe have been accepted and recognised since the 1990s (Bilton *et al.*, 1998; Taberlet *et*  
12 *al.*, 1998; Hewitt 2000), the concept of cryptic northern glacial refugia also became a  
13 paradigm to explain the complex phylogeographic patterns and processes of European biota  
14 (Stewart & Lister, 2001; Pazonyi 2004; Sommer & Nadachowski, 2006). Fossil records and  
15 phylogenetic analyses revealed that many species of flora and fauna could have survived  
16 during the LGM in the Carpathian Basin (Stewart & Lister, 2001; Pazonyi, 2004; Sommer &  
17 Nadachowski, 2006; Stojak *et al.*, 2015), in Dordogne region (Steward *et al.*, 2010) and in  
18 the Ardennes (Stewart & Lister, 2001), and glacial refugia could also be located in Crimea  
19 (Marková, 2011) or the Russian Plain (Banaszek *et al.*, 2012). Nowadays, locations of  
20 southern and northern glacial refugia during the LGM are hotspots of genetic diversity (Petit  
21 *et al.*, 2003; Stojak *et al.*, 2016).

22 The Eurasian pygmy shrew *Sorex minutus* Linnaeus, 1766 (Eulipotyphla, Soricidae)  
23 (Hutterer, 1990) has been used as a phylogeographic model species for studying the  
24 persistence of populations in northern European refugia during the LGM (Bilton *et al.*, 1998;  
25 McDevitt *et al.*, 2010; Vega *et al.*, 2010a, b). It is one of the few mammalian species that is  
26 widely distributed in the three Mediterranean peninsulas, and in Central and Northern  
27 Europe (Fig. 1A); therefore, *S. minutus* is an excellent model for understanding the effects of  
28 the glaciations in Europe and the colonisation history during the Pleistocene and postglacial

1 times. Although several studies have found evidence supporting the hypotheses of southern  
2 geographic isolation and genetic diversification, and population expansion from cryptic  
3 northern glacial refugia (Bilton *et al.*, 1998; McDevitt *et al.*, 2010; Vega *et al.*, 2010a, b), little  
4 is known about the phylogeographic structure, genetic differentiation and demographic  
5 history of this small mammal within these regions due to the limited number of samples from  
6 Mediterranean peninsulas. An expanded phylogeographic study of the pygmy shrew is  
7 therefore important for the understanding and further development of biogeographic models  
8 of glacial refugia and postglacial recolonization, for depicting areas with high intraspecific  
9 genetic diversity, for establishing conservation measures of rear-edge populations, and for  
10 the preservation of the evolutionary potential of species, particularly in the face of climate  
11 and anthropogenic change (Deffontaine *et al.*, 2005; Provan & Bennett, 2008; Stojak *et al.*,  
12 2019; Stojak & Tarnowska, 2019).

13 In this study, we explored the evolutionary history and phylogeographic structure of  
14 *Sorex minutus* using a statistical phylogeography approach (Knowles & Maddison, 2002;  
15 Knowles, 2009). Here, we emphasise the genetic diversity and structure within and among  
16 refugia, the inference of geographical barriers and the demographic history of *S. minutus*,  
17 which are aspects that have not been studied in detail previously. Specifically, we asked the  
18 following questions: 1) What are the geographical distribution and genetic diversity patterns  
19 of the genealogical lineages of *S. minutus*? 2) Is there an isolation-by-distance pattern  
20 across the geographic range of *S. minutus* or do the lineages show significant population  
21 genetic structure? 3) What is the historical demography of *S. minutus* in Europe? Our results  
22 showed support for distinct and genetically diverse lineages, geographical barriers  
23 concordant with glaciated mountain ranges during the LGM, and recent (post-LGM)  
24 population expansions with contemporary contact areas. The results presented here have  
25 implications for the long-term conservation of intraspecific diversity and the preservation of  
26 the evolutionary potential of *S. minutus* in the face of modern climate change.

27

28 MATERIALS AND METHODS

## 1 *Study species*

2 *Sorex minutus* is common over most of its distribution but is rarely dominant and it occurs in  
3 a wide range of terrestrial habitats with adequate ground cover and in relatively damp areas,  
4 including swamps, grasslands, heaths, sand dunes, woodland edge, rocky areas, shrubland  
5 and montane forests (Hutterer, 1990, 2016; Churchfield, 1990; Churchfield & Searle, 2008).  
6 It is found from southern and western Europe to much of central and northern Europe,  
7 Ireland and the British Isles, and Siberia to Lake Baikal in the east (Hutterer, 1990, 2016). It  
8 is found from sea level up to 2260 m (in the Alps), but its distribution becomes patchy and  
9 limited to higher altitudes in southern Europe where it occurs with some degree of  
10 geographical isolation and differentiation, while in central and northern parts of Europe and  
11 in Siberia it is more abundant and populations are more connected and widespread  
12 (Hutterer, 1990, 2016).

13

## 14 *Samples and molecular methods*

15 A total of 671 cytochrome b (cyt b) DNA sequences of *S. minutus* from Europe and Siberia  
16 were used for this study (Fig. 1B; see Supplementary information Table S1). DNA  
17 sequences were obtained from samples collected from the wild following ethical guidelines  
18 (Sikes, Gannon & the Animal Care and Use Committee of the American  
19 Society of Mammalogists, 2011), or from museums, and from published GenBank data  
20 (including AB175132: Ohdachi *et al.*, 2006; AJ535393 – AJ535457: Mascheretti *et al.*, 2003;  
21 GQ272492 – GQ272518: Vega *et al.*, 2010a; GQ494305 – GQ494350: Vega *et al.*, 2010b;  
22 and JF510376 – JF510321: McDevitt *et al.*, 2011). In addition, four cyt b sequences of *S.*  
23 *volnuchini*, which was used as an outgroup (Fumagalli *et al.*, 1999), were incorporated into  
24 the analysis (including AJ535458: Mascheretti *et al.*, 2003).

25 Genomic DNA from wild and museum samples was extracted using a commercial kit  
26 (Qiagen). Partial (1110 bp) cyt b sequences were obtained by PCR using two primer pairs  
27 that amplified approximately 700 bp of overlapping fragments, or using five primer pairs (for  
28 museum samples with highly degraded DNA) that amplified approximately 250 bp of

1 overlapping fragments (Vega *et al.*, 2010a). PCR amplification was performed in a 50 µl final  
2 volume: 1X Buffer, 1 µM each primer, 1 µM dNTP's, 3 mM MgCl<sub>2</sub> and 0.5 U Platinum Taq  
3 Polymerase (Invitrogen), with cycling conditions: 94°C for 4 min, 40 cycles at 94°C for 30 s,  
4 55°C for 30 s and 72°C for 45 s, and a final elongation step at 72°C for 7 min. Purification of  
5 PCR products was done with a commercial kit (Qiagen) and sequenced (Macrogen and  
6 Cornell University Core Laboratories Center).

7

### 8 *Phylogenetic analysis*

9 Sequences were edited in BioEdit version 7.0.9.0 (Hall, 1999), aligned in ClustalX version  
10 2.0 (Larkin *et al.*, 2007). A haplotype data file was obtained using DnaSP version 5.10.1  
11 (Librado & Rozas, 2009). Newly obtained haplotypes were deposited in GenBank  
12 (Accession Numbers: XXXXX – XXXXX).

13 The model of evolution that best fitted the molecular data (haplotypes) was searched  
14 using jModelTest version 2.1.10 (Darriba *et al.*, 2012) using the Bayesian Information  
15 Criterion value. The substitution model supported was the GTR with specified substitution  
16 types (A–C=0.4250, A–G=23.5124, A–T=1.6091, C–G=1.8671, C–T=17.2314, G–  
17 T=1.0000), proportion of invariable sites (0.6044), gamma shape parameter (0.2816) and  
18 nucleotide frequencies (A=0.2777, C=0.3076, G=0.1416, T=0.2731).

19 The phylogenetic relationships among cyt b haplotypes of *S. minutus* were inferred  
20 by Bayesian analysis and by generating a parsimony phylogenetic network. The Bayesian  
21 analysis was done using MrBayes version 3.2.7 (Ronquist *et al.*, 2012) with two independent  
22 runs (10 million generations and 5 chains each), a sampling frequency every 1000  
23 generations and temperature of 0.1 for the heated chain, and checking for convergence in  
24 Tracer version 1.7.1 (Rambaut *et al.*, 2018). Trees were summarized after a burn-in value of  
25 2500 to obtain the posterior probabilities of each phylogenetic branch. The main  
26 phylogenetic groups (phylogroups) were identified based on monophyly of the haplotypes,  
27 and were named based on the geographical origin of the samples. The phylogenetic network

1 was done using PopART version 1.7 (<http://popart.otago.ac.nz>) implementing a median-  
2 joining algorithm.

3           Sequence polymorphism indices and diversity values, including the number of  
4 haplotypes (H), polymorphic (segregating) sites (S) and parsimony informative sites (P),  
5 haplotype diversity (Hd), nucleotide diversity ( $\pi$ ), and average number of nucleotide  
6 differences (k), were estimated using DnaSP. This was done for the whole data set  
7 (ingroup), for the main phylogroups, and also for other relevant geographic groups, including  
8 island populations and continental samples.

9

#### 10 *Population genetic structure*

11 Pairwise genetic differentiation values ( $F_{ST}$ ) between all pairs of phylogroups and other  
12 relevant geographic groups, and an Analysis of Molecular Variance (AMOVA) were  
13 calculated using Arlequin version 3.11 (Excoffier *et al.*, 2005). Ten thousand nonparametric  
14 permutations were performed to generate a random distribution to test the significance of the  
15 pairwise  $F_{ST}$  values and covariance components of the AMOVA, and  $\alpha = 0.05$  was set as the  
16 threshold for statistical significance.

17           A Mantel test was used to evaluate the relationship between matrices of pairwise  
18 geographic distances and genetic differentiation values (Slatkin's linearised pairwise  $F_{ST}$  as  
19  $D = F_{ST}/(1-F_{ST})$ ; Slatkin, 1995). Despite criticisms, the Mantel test is still a widely used and  
20 can be a powerful statistical approach to analyse sequence data to test evolutionary  
21 hypotheses (Diniz-Filho *et al.*, 2013). Due to the very low (or absence of) genetic variation in  
22 the Orkney islands, DNA sequences originating from there were pooled to avoid issues with  
23 pairwise  $F_{ST}$  calculations.

24           Geographic barriers were computed using Barrier version 2.2 (Manni *et al.*, 2004).  
25 This approach implements Monmonier's maximum difference algorithm to find edges  
26 (boundaries) on a Voronoi tessellation associated with the highest rate of change in genetic  
27 distances among samples interconnected by a geometric network (i.e. Delaunay  
28 triangulation) (Manni *et al.*, 2004). A barrier highlights the geographic areas where a genetic



1 discontinuity is found, and where samples on each side of the barrier are genetically more  
2 similar than samples taken on different sides of the boundary. Pairwise genetic distances  
3 were estimated using continental samples only, limiting the data set in the geometric network  
4 calculation to one sample per locality, and computing a maximum of 10 barriers.

5

### 6 *Historical demography*

7 A strict molecular clock was compared to the uncorrelated lognormal relaxed molecular clock  
8 (Drummond *et al.*, 2006). Coalescent constant population size and Bayesian skyline  
9 demographic models (Drummond *et al.*, 2005) were compared to identify the best-fitting  
10 pattern of changes in the pygmy shrew population. For model selection, path sampling and  
11 stepping-stone sampling (Baele *et al.*, 2013), based on four independent MCMC chains  
12 (1000 steps of 100,000 generations each, following a 10 million generations burn-in period),  
13 were used for calculating the log Marginal Likelihoods Estimates (MLEs) for each model.  
14 MLEs were used to calculate Bayes Factors (BFs) for each comparison between tested  
15 models to determine the best-fitting one (Kass & Raftery, 1995). The best-fitting models  
16 were then used to estimate the Time of divergence from the Most Recent Common Ancestor  
17 (TMRCA) and Bayesian Skyline Plots (BSP) (see below). The 95% Highest Posterior  
18 Density (HPD) was included in the TMRCA and BSP estimations.

19 TMRCA for the ingroup (all *S. minutus* samples) and the phylogroups were  
20 estimated using BEAST version 2.5.2 (Bouckaert *et al.*, 2014). The following prior  
21 assumptions were: random starting tree, monophyletic groups (for the ingroup and the Irish  
22 phylogroups) (Drummond *et al.*, 2006) to calculate the evolutionary rate, and the GTR  
23 substitution model with four categories, gamma = 0.9680 and proportion of invariable sites =  
24 0.4680 (from jModelTest using the full data set). The oldest record of *S. minutus* has been  
25 found in Podlesice and Mała Cave, Poland dated between 5.3 and 3.6 MYA (Early Pliocene;  
26 Mammal Neogene 14) (Rzebik-Kowalska, 1998). Using this fossil information, a calibration  
27 point for the ingroup was set at 4.45 MYA (SD = 0.5 MY; 5.27 – 3.63 MYA) with a normal  
28 prior distribution. A second calibration was set for the Irish lineage at 0.006 MYA (SD =

1 0.0005 MY; 0.00682 – 0.00518 MYA) based on the inferred colonisation time of Ireland by *S.*  
2 *minutus* using control region sequences (McDevitt *et al.*, 2009). The trace files were  
3 analysed in Tracer, the tree information from the four runs were combined and resampled at  
4 a lower frequency (for a total of 10,000 trees) using LogCombiner, and the information was  
5 summarized using TreeAnnotator selecting Maximum clade credibility tree and median  
6 heights. The phylogenetic tree showing the TMRCAs was created using FigTree version  
7 1.4.4 (<http://tree.bio.ed.ac.uk/software/figtree/>).

8 Genetic evidence of population expansion for the phylogroups, island populations  
9 and continental samples was investigated using the  $R_2$  test of neutrality (Ramos-Onsins &  
10 Rozas, 2002), based on the difference of the number of singleton mutations and the average  
11 number of nucleotide differences, and Fu's  $F_s$  (Fu, 1997), a statistic based on the infinite-site  
12 model without recombination that shows large negative  $F_s$  values when there has been a  
13 demographic population expansion. Both population expansion tests were carried out in  
14 DnaSP using coalescent simulations for testing significance (10,000 replicates).

15 Mismatch distributions (i.e. the distribution of the number of differences between  
16 pairs of haplotypes) were estimated for the phylogroups (and where  $N \geq 10$ ) to compare the  
17 demography of the populations with the expectations of a sudden population expansion  
18 model (Rogers & Harpending, 1992). For the phylogroups and continental samples that  
19 showed a unimodal mismatch distribution and significant population expansion, the time  
20 since the population expansion ( $t$ ) was calculated as  $t = \tau/2u$ , where  $\tau$  (tau) is the mode for  
21 the unimodal mismatch distribution, and  $u$  is the cumulative (across the sequence)  
22 probability of substitution (Schenekar & Weiss, 2011). The calculations were done using the  
23 MS Excel Mismatch Calculator (Schenekar & Weiss, 2011) with sequence length = 1110 bp,  
24 generation time = 1 year (Hutterer *et al.*, 2016), percent divergence/MY = 0.551 (based on  
25 the average substitution rate across all sites clock rate results from BEAST) and cumulative  
26 substitutions/generation = 0.00062.

27 BSPs were calculated using BEAST based on the posterior distribution of effective  
28 population size through time from a sample of gene sequences. This was done for the

1 phylogroups showing a unimodal mismatch distribution and significant signatures of recent  
2 population expansion (where  $N \geq 10$ ). The analysis was run for 100 million generations,  
3 sampled every 1000, using the best-fitting model.

4

## 5 RESULTS

### 6 *Phylogenetic analysis*

7 For the complete *S. minutus* data set ( $N = 671$ ) (Fig. 1B), there were 424 haplotypes with  
8 390 polymorphic sites of which 277 were parsimony informative (Table 1). We report 160  
9 newly sequenced specimens of *S. minutus* from the Iberian (4) and Balkan (19) peninsulas  
10 and from Central and Northern Europe (137) from which 127 were new haplotypes. Also,  
11 there were three new sequences and haplotypes of *S. volnuchini*, from which two were from  
12 Turkey and one from the Crimean Peninsula.

13 The Bayesian phylogenetic analysis showed *S. minutus* as a monophyletic group and  
14 revealed six distinct lineages corresponding to their geographical origin (i.e. phylogroups)  
15 supported by high posterior probabilities (Fig. 2A). Samples from the Mediterranean  
16 peninsulas clustered in three distinct phylogroups, namely the Iberian, Italian and Balkan  
17 phylogroups. The Iberian group was represented with few DNA sequences ( $N = 6$ ). It was  
18 geographically restricted to the Iberian Peninsula and included samples from Rascafría,  
19 Central Spain (Sierra de Guadarrama) and Picos de Europa, Northern Spain. The Italian  
20 phylogroup ( $N = 26$ ) was mostly restricted to the north-central regions of the Italian  
21 peninsula; it included samples from the Apennines and the Alps in Italy, but also from  
22 Switzerland, Slovenia, Southern and Eastern France near the border with Italy, Czech  
23 Republic and Germany. The Balkan phylogroup ( $N = 22$ ) included samples mostly from the  
24 Balkan Peninsula and a few from further north in Central Europe. This phylogroup showed a  
25 weak north/south subdivision, with one clade containing samples from Switzerland, Austria,  
26 Slovakia, Czech Republic, Hungary and Montenegro, another clade containing samples from  
27 Serbia, Bosnia and Herzegovina and North Macedonia, plus other ungrouped basal samples  
28 from Montenegro, North Macedonia, Serbia and Turkey (East Thrace, Southeast Europe).

1           There was also a well-supported and geographically widespread Western phylogroup  
2 (N = 283), which included samples from northern Spain (Cantabrian Mountain Range),  
3 Southern France and Andorra (i.e. the Pyrenees), western and central France (including  
4 Belle-Île), Ireland, the Orkney Islands, and western mainland Britain and offshore islands on  
5 the western coast of mainland Britain. Samples from Ireland formed an internal monophyletic  
6 lineage (i.e. the Irish phylogroup, N = 94) within the Western phylogroup. Notably, two  
7 samples from Navarra in northern Spain (ESNa0861 and ESNa1131; Accession Number  
8 JF510331) shared haplotypes with samples from Ireland. A monophyletic South Italian  
9 phylogroup (N = 4) was most closely related to the Western phylogroup than to the Italian  
10 phylogroup, and was geographically restricted to La Sila, Calabria in Southern Italy.

11           Samples from northern and central Europe and Siberia, namely the Northern  
12 phylogroup (N = 330), formed the most geographically widespread lineage and included  
13 samples ranging from Central France and Britain (excluding those within the Western  
14 phylogroup), across Central and Northern Europe to Lake Baikal in Siberia, but did not  
15 include samples from Southern Europe. Samples from mainland Britain belonging to the  
16 Northern phylogroup did not form an internal monophyletic cluster.

17           The phylogenetic network had a complex structure (Fig. 2B), but the haplotypes  
18 clustered into the same phylogroups detected with Bayesian phylogenetics and were  
19 distantly related from each other (> 10 mutational steps). The Western phylogroup had a  
20 star-like pattern and showed three most internal haplotypes; notably, one internal haplotype  
21 (Hap\_64) included samples from Northern Spain and Ireland, and many other Irish  
22 haplotypes derived from it. The Northern phylogroup showed a star-like pattern with many  
23 reticulations and three most internal haplotypes separated from each other by few mutational  
24 steps. There was an apparent geographical subdivision within the Northern phylogroup,  
25 where samples from Siberia, Eastern and Northern Europe were derived or most closely  
26 connected to samples from Central Ukraine (Hap\_287), samples from Central Europe were  
27 derived or most closely connected to samples from The Netherlands (Hap\_274), and all  
28 samples from Britain were derived or most closely connected to other samples from The

1 Netherlands than to the other central haplotypes (Hap\_90); however, the highly reticulated  
2 pattern of the inner haplotypes of the Northern phylogroup indicated that this geographical  
3 subdivision was weak.

4         Sequence polymorphism indices and diversity values for the phylogroups and other  
5 geographic groups are shown in Table 1. For the phylogroups, the haplotype diversity values  
6 were high (>90%), and the nucleotide diversity values were either half or almost half as  
7 much as the ingroup. Notably, the Northern phylogroup had the highest haplotype diversity  
8 values, followed by the Balkan phylogroup; however, the Balkan phylogroup had the highest  
9 nucleotide diversity values. The Irish phylogroup, which clustered within the Western  
10 phylogroup, showed slightly lower haplotype diversity than any other phylogroups.

11         The continental groups (Northern continental and Western continental) showed  
12 equivalent DNA polymorphism values as the main phylogroups, but the island groups  
13 showed different levels of DNA polymorphism (Table 1). There was low DNA polymorphism  
14 in islands of the Orkney Archipelago, with only 11 haplotypes in all Orkney Islands combined  
15 (N = 119), but all haplotypes were unique to these islands. There were eight haplotypes in  
16 Orkney Mainland (N = 44), from which seven were unique to this island (the largest island of  
17 the archipelago), there were two unique haplotypes in Orkney South Ronaldsay (N = 40),  
18 and there was only one haplotype in Orkney Westray (N = 33) also present in Orkney Hoy  
19 (N = 2) and Orkney Mainland. There were five haplotypes in Belle-Île (N = 5), and only one  
20 was present in the continent also belonging to the Western phylogroup. The British group (N  
21 = 91) showed high haplotype diversity but moderate nucleotide diversity values and had 80  
22 haplotypes from which 77 were unique haplotypes not found elsewhere.

23

#### 24 *Population genetic structure*

25 The highest pairwise differentiation values were found between some southern phylogroups  
26 and island groups, while the lowest values were between phylogroups and islands groups  
27 that clustered within them (Supplementary information Table S2). There was higher  
28 percentage of variation among (73.5 %) than within (26.5 %) groups, and there was a

1 significant population differentiation ( $F_{ST} = 0.7349$ ,  $P < 0.0001$ ). The Mantel test showed a  
2 nonsignificant relationship between pairwise geographic and genetic distances based on  
3 Slatkin's linearised  $F_{ST}$  ( $R_2 = 0.0095$ ,  $P = 0.2935$ ) (Supplementary information Fig. S1).

4 The barriers identified using the computational geometry approach reflected the  
5 genetic differentiation between *S. minutus* and *S. volnuchini*, and among the phylogroups  
6 within *S. minutus* (Fig. 1C). The first barrier separated *S. minutus* from *S. volnuchini*. The  
7 nine following barriers coincided with the location of mountain ranges, including a barrier  
8 located in the north of the Balkan Peninsula, in the Alps and in the Pyrenees, which reflected  
9 the genetic subdivisions and lineages in *S. minutus*.

10

#### 11 *Historical demography*

12 Comparison of BFs for each model indicated the Bayesian skyline demographic model as  
13 the best-fitting one (BF = 391), and the strict molecular clock was better than the  
14 uncorrelated lognormal relaxed molecular clock (BF = 23). The MLEs for the constant  
15 population size and Bayesian skyline demographic models using the strict molecular clock  
16 were -10960 and -10569, while using the uncorrelated lognormal relaxed molecular clock  
17 were -10907 and -10592, respectively. Therefore, the strict clock and Bayesian skyline  
18 demographic model were selected as the best-fitting according to BFs. The effective sample  
19 size (ESS) for all values was higher than 200.

20 All branches of the Bayesian genealogy (Fig. 3, Table 2) were well-supported  
21 (posterior probabilities  $PP \geq 0.97$ ), except for the clade containing all phylogroups excluding  
22 Iberian ( $PP = 0.05$ ). The ingroup split approximately KYA 83.4, with lower and upper 95%  
23 highest posterior density HPD limits of approximately between 59.7 and 110.2 KYA. The  
24 Iberian phylogroup split approximately 31.8 KYA (95% HPD: 22 – 43.1 KYA, respectively.  
25 The Balkan phylogroup had a TMRCA of approximately 29.6 KYA (95% HPD: 21.8 – 40.5  
26 KYA). The Northern and Western phylogroups split approximately 24.1 KYA (95% HPD: 16.4  
27 – 33.1 KYA), and the Irish phylogroup arose approximately 5.9 KYA (95% HPD: 4.9 – 6.9  
28 KYA). The Italian phylogroup had a TMRCA of approximately 15.3 KYA (95% HPD: 10.7 –

1 21.5 KYA), while the South Italian phylogroup of approximately 12.8 KYA (95% HPD: 8.5 –  
2 17.8 KYA).

3 The population expansion tests ( $R_2$  and Fu's  $F_s$ ) showed significant departures from  
4 neutrality for the ingroup and several other phylogroups, except for the Balkan, Iberian and  
5 South Italian (Table 2). The population expansions were not an effect of the island samples  
6 belonging to these phylogroups, and continental samples analysed separately also  
7 demonstrated a similar pattern (Table 2). For the island groups, only the Irish and British  
8 groups showed signatures of recent population expansions (Table 2).

9 The mismatch distributions varied significantly among the phylogroups (Fig. 4A;  
10 Supplementary information Fig. S2). The ingroup showed a bimodal mismatch distribution,  
11 which reflected the pairwise comparisons within and among phylogroups in *S. minutus*. The  
12 Northern (and Northern continental), Italian, Western (and Western continental) and Irish  
13 phylogroups all had distinctly unimodal distributions with an almost perfect fit between  
14 observed and expected pairwise differences of a sudden population expansion model. All  
15 population expansions for the phylogroups were dated to the Holocene; the Italian and  
16 Northern phylogroups had the oldest times of expansion (>8.0 KYA), while the Irish showed  
17 a relatively recent population expansion dated to 1.6 KYA.

18 The BSP obtained for three phylogroups (Northern, Western and Irish) suggested  
19 that demographic expansions of these populations started approximately 5.0 KYA (Fig. 4B).  
20 BSP calculation for the Italian phylogroup indicated an even earlier demographic expansion  
21 (approximately 5.5 KYA) (Fig. 4B).

22

## 23 DISCUSSION

24 Quaternary refugia represent the geographical regions that species inhabit during periods of  
25 glacial and interglacial cycles when there is the maximum contraction in geographical range  
26 (Stewart *et al.*, 2009). There is support for both southern (Taberlet *et al.*, 1998; Hewitt, 2000)  
27 and northern glacial European refugia (Bilton *et al.*, 1998; Stewart & Lister, 2001; Kotlík *et*  
28 *al.*, 2006; Provan & Bennett 2008; Fløjgaard *et al.*, 2009; Vega *et al.*, 2010a, b). Rather than

1 polarising the biogeographic patterns into southern and northern refugia (Tzedakis *et al.*,  
2 2013), the paradigms of postglacial colonisation in Europe (Hewitt, 2000) can be improved  
3 with the acceptance of southern hotspots of diversification without northward colonisation  
4 (Bilton *et al.*, 1998) and the concept of refugia-within-refugia (Gómez & Lunt, 2007), as well  
5 as with the findings of cryptic northern glacial refugia (Stewart & Lister 2001; Provan &  
6 Bennett, 2008; Stewart *et al.*, 2009), to reflect the evolutionary processes across varied  
7 topographical areas that have shaped genetic diversity. The statistical phylogeographic  
8 results obtained here, using published and newly described samples and haplotypes,  
9 notably expand previous findings on *S. minutus*, giving a more precise population genetic  
10 structure and demographic history. Thus, our findings on *S. minutus* contribute to the  
11 understanding of the phylogeographic patterns and processes during the Quaternary  
12 glaciations that shaped the European biota, and contribute to the emerging pattern of  
13 complex biogeographical histories in Europe (Pedreschi *et al.*, 2019).

14

#### 15 *Sorex minutus* phylogeography

16 The significant genetic structure among phylogroups defined in this study illustrate the  
17 complex history of European colonisation, isolation and diversification of *S. minutus* during  
18 the Pleistocene and Holocene, and is not a simple case of isolation by distance and  
19 colonisation of Northern and Central Europe from expanding populations from the south.  
20 While the southern phylogroups, including the Iberian, Balkan, Italian and South Italian, were  
21 mostly restricted to the Southern European peninsulas (consistent with the traditional  
22 southern glacial refugia), the Northern and Western phylogroups were widespread  
23 geographically and were found north of the Mediterranean peninsulas, consistent with  
24 previous studies with fewer samples (Bilton *et al.*, 1998; Mascheretti *et al.*, 2003; Vega *et al.*  
25 2010a, b) and with different molecular markers (McDevitt *et al.*, 2010).

26 The hypothesis of northern refugia is further supported by palaeontological and  
27 palynological evidence for other temperate and boreal species (Willis *et al.*, 2000; Willis &  
28 van Andel, 2004; Magri *et al.*, 2006; Sommer & Nadachowski, 2006), as well as many



1 phylogeographic studies in small mammals, including the field vole *M. agrestis* (Jaarola &  
2 Searle, 2002), bank vole *M. glareolus* (Deffontaine *et al.*, 2005; Kotlík *et al.*, 2006; Wójcik *et*  
3 *al.*, 2010), root vole *M. oeconomus* (Brunhoff *et al.*, 2003), common vole *M. arvalis* (Heckel  
4 *et al.*, 2005; Stojak *et al.*, 2016), common shrew *S. araneus* (Bilton *et al.*, 1998; Yannic *et al.*,  
5 2008) and weasels *Mustela nivalis* (McDevitt *et al.*, 2012). For several small mammals,  
6 including *S. minutus*, suitable climatic conditions at the LGM could have been widespread  
7 across Central and Eastern Europe (Fløjgaard *et al.*, 2009; Vega *et al.*, 2010b; McDevitt *et*  
8 *al.* 2012; Stojak *et al.*, 2019).

9         Until recently, it was unclear which species of *Sorex* inhabit Crimea. According to  
10 Zagorodniuk (1996) it could be *S. (minutus) dahli* [mentioned in Hutterer (2005) as a  
11 synonym of *Sorex volnuchini (dahli)*], and Zaitsev *et al.* (2014) and Hutterer *et al.* (2016)  
12 showed *S. minutus* in mainland Ukraine and in Crimea. Hutterer (2005) mentioned that *S.*  
13 *volnuchini* might be present in Crimea, but in Hutterer *et al.* (2016) *S. volnuchini* is only  
14 shown in southern Russia and Caucasus States, Turkey and northern Iran. Our research  
15 demonstrated that *S. volnuchini* may be present in the southern region of Crimea (based on  
16 one cyt b sequence), while *S. minutus* is present in the mainland, but further sampling in this  
17 region is needed.

18         The finding that in both the Iberian and Italian peninsulas there are two genetic  
19 lineages of *S. minutus* (four in total) suggests that the refugial areas may have had  
20 subdivisions at the LGM. In the Iberian Peninsula, the topography of the region with east-  
21 west mountain ranges and other high ground (over 1000 m a.s.l.), large rivers (which could  
22 act as barriers to dispersal), and the distinct seasonal precipitation and vegetation types  
23 (O'Regan, 2008), must have played an important role in the genetic differentiation of  
24 populations and could explain the presence of two phylogroups (i.e. the Iberian and Western  
25 phylogroups). McDevitt *et al.* (2010) proposed that the Western phylogroup could have  
26 originated in the Dordogne region based on a limited number of samples from France but the  
27 presence of this phylogroup in northern Iberia could mean that an Iberian origin is possible  
28 instead. A similar process could explain the presence of the two phylogroups in the Italian

1 peninsula (i.e. Italian and South Italian). The genetic differentiation of the South Italian  
2 phylogroup, further supported by morphological data (Vega *et al.*, 2010a), could be due to  
3 the unique geography of Southern Italy consisting of mountain massifs of Pollino, La Sila  
4 and Aspromonte separated by lowland areas, which from the Pliocene to the end of the  
5 Middle Pleistocene, at times of high sea level, were islands in a chain (Malatesta, 1985;  
6 Caloi *et al.*, 1989; Bonardi *et al.*, 2001; Bonfiglio *et al.*, 2002). The patterns of differentiation  
7 within refugial areas were concordant with the 'refugia-within-refugia' concept widely  
8 recognized for the Iberian Peninsula (Gómez & Lunt, 2007; Abellán & Svenning, 2019) and  
9 similar to microrefugia in the Balkans (Kryštufek *et al.*, 2007). For the Italian peninsula, a  
10 comparable 'refugia-within-refugia' pattern was found in several species (Amori *et al.*, 2008;  
11 Canestrelli *et al.*, 2008; Castiglia *et al.*, 2008; Vega *et al.*, 2010a; Senczuk *et al.*, 2017;  
12 Bisconti *et al.*, 2018).

13         The genetic similarity between the Western and South Italian phylogroups indicates a  
14 common history and it can be hypothesised that their common ancestor was more  
15 widespread throughout the Italian peninsula, probably displaced later by the Italian lineage in  
16 the Apennines and Western Alps. A similar scenario has been proposed for the water shrew  
17 *Neomys fodiens* (Castiglia *et al.*, 2007), Alpine salamander *Salamandra salamandra*  
18 (Steinfartz *et al.*, 2000), black pine *Pinus nigra* (Afzal-Rafii & Dodd, 2007) and green lizard  
19 *Lacerta bilineata bilineata* (Böhme *et al.*, 2007), which showed closely related South Italian  
20 and Western phylogroups most closely related to each other than to a North-Central Italian  
21 lineage.

22         The phylogeographic patterns found here were further supported by the  
23 determination of barriers that coincided with mountain ranges located on the north of the  
24 Iberian, Italian and Balkan peninsulas. Contact zones among phylogroups (i.e. localities  
25 where at least two cyt b phylogroups were present) were detected at the northern extremes  
26 of the southern peninsulas. During the LGM, glaciers covered most of the Alpine  
27 (Buoncristiani & Campy, 2004) and Pyrenean mountain ranges (Calvet, 2004), while glaciers  
28 in the Carpathians (Reuther *et al.*, 2007) and in the Balkan Peninsula (Hughes *et al.*, 2006)

1 were found > 1,000 m a.s.l. When climate ameliorated and suitable habitat became  
2 available, pygmy shrew populations belonging to different phylogroups on different sides of  
3 the mountain ranges could have expanded and colonised previously glaciated areas thus  
4 forming the observed contact zones. Moreover, the widespread distribution and absence of  
5 phylogeographic structure of the Northern phylogroup could be explained by the apparent  
6 absence of major geographical barriers across Central and Northern Europe, and  
7 recolonization from northern refugia. Similarly, pygmy shrews belonging to the Western and  
8 Northern phylogroups could have quickly colonised mainland Britain across a land  
9 connection to continental Europe (i.e. Doggerland; Gaffney *et al.*, 2007), resulting in the  
10 genetic similarities observed between the British Isles and continental Europe.

11

#### 12 *Sorex minutus* demography

13 The oldest fossils assigned to *S. minutus* were found in Podlesice and Mała Cave, Poland  
14 dated to the Early Pliocene between 4 and 5.3 MYA (Rzebik-Kowalska, 1998). An early  
15 widespread colonisation of Europe by *S. minutus* might have been possible because it was  
16 probably one of the first species of the genus *Sorex* in the continent (Rzebik-Kowalska,  
17 1998, 2008). The Bayesian analysis revealed, however, recent timing of diversification  
18 events, with TMRCAs for the ingroup and the phylogroups in continental Europe between  
19 the Upper Pleistocene and Lower Holocene, and in the Middle Holocene for the Irish  
20 phylogroup. Similar colonisation scenarios and divergence before the LGM from Eastern to  
21 Western Europe have been proposed for other species, including the common vole *Microtus*  
22 *arvalis* (Heckel *et al.*, 2005; Stojak *et al.*, 2016), the bank vole *Clethrionomys glareolus*  
23 (Deffontaine *et al.*, 2005; Kotlík *et al.*, 2006; Wójcik *et al.*, 2010), and the root vole *M.*  
24 *oeconomus* (Brunhoff *et al.*, 2003).

25 The population expansion signatures for the Northern and Western phylogroups,  
26 star-like patterns in phylogenetic networks and population expansion times support recent  
27 and quick colonisation events of central and northern Europe, and appear to reflect  
28 responses to postglacial climate warming. The Western lineage was restricted to Central,

1 Western and South-Eastern France and North-Western Spain in continental Europe, but it  
2 was the only lineage found in Ireland and several islands off the west and north coasts of  
3 Britain. The region of the Dordogne in South-Western France was situated outside the LGM  
4 permafrost area and has temperate mammal fossil records dated to the end of the LGM;  
5 therefore, it has been suggested as another likely northern refugium (Sommer &  
6 Nadachowski, 2006; McDevitt *et al.*, 2010) where the Western lineage could have persisted  
7 and recolonised Western and Central France after the LGM. But as stated above, an Iberian  
8 origin for this phylogroup is also possible. However, SDM studies showed that suitable  
9 climatic conditions during the LGM for *S. minutus* and other temperate small mammal  
10 species could have been more continuous and present further north (Fløjgaard *et al.*, 2009;  
11 Vega *et al.*, 2010b), which could explain its widespread distribution in Western Europe and  
12 its presence in Britain. According to BSP results, it is plausible that Northern and Western  
13 phylogroups spread across Europe after the Younger Dryas (11.7 to 12.9 KYA). The British  
14 (island) group, belonging to the Northern phylogroup, showed a significant signature of  
15 population expansion. This expansion could have selectively displaced pygmy shrew  
16 populations of the Western lineage, which still remain in uplands and islands in the periphery  
17 to the north, west and south of Britain forming a 'Celtic fringe' (Searle *et al.*, 2009).

18 The widespread Italian lineage may be presumed to derive from a glacial refugium  
19 located somewhere within the vicinity of the Apennine mountain chain. A significant  
20 population expansion signature demonstrates that the Italian phylogroup went through a  
21 recent expansion phase, calculated in BSP for about 5.5 KYA. Contrastingly, the lack of a  
22 population expansion signature, the high nucleotide and haplotype diversities, and the highly  
23 divergent sequences showing a weak north/south subdivision of the Balkan phylogroup  
24 warrants further attention. The Balkans is a European hotspot for biodiversity given its  
25 environmental stability, topographic and climatic diversity and occasional connectedness  
26 with Asia Minor (Kryštufek & Reed, 2004; Kryštufek *et al.*, 2007, 2009; Bužan *et al.*, 2010),  
27 and it could be expected that some of these factors shaped the genetic diversity of the  
28 Balkan lineage there. Similarly, the lack of significant population expansion values for the

1 Iberian lineage may relate to historical stable population sizes; however, the sample size  
2 was low and this result should be taken with caution.

3

#### 4 *Further considerations and implications*

5 The comparison of the results obtained here with those elsewhere shows an emerging  
6 pattern of glacial refugia in Mediterranean peninsulas and further north in Central Europe for  
7 several species.

8         Although *S. minutus* is considered as a least concern species by the IUCN (Hutterer  
9 *et al.*, 2016), the distinct phylogroups deserve more attention than this implies. Genetic  
10 diversity is considered an important aspect of global biodiversity (McNeely *et al.*, 1990), and  
11 local and/or country-based conservation efforts are highly valued (for example, in Britain and  
12 Ireland the pygmy shrew is protected by law). The refugial areas in Southern Europe are  
13 often found in mountain ranges at the low-latitude margins of the present-day distribution  
14 ranges of species and are most likely to contain rear-edge populations where selection for  
15 local adaptations could have resulted in the evolution of distinct ecotypes (Cook, 1961;  
16 Hampe & Petit, 2005). Rear-edge populations, including the southern lineages of *S. minutus*,  
17 deserve further investigation and should be regarded for conservation because they are  
18 important to determine the responses of species to modern climate change (Petit *et al.*,  
19 2003; Hampe & Petit, 2005).

20         In conclusion, the Eurasian pygmy shrew *Sorex minutus* is a good model for  
21 understanding biological diversity, colonisation patterns and the effects of past climate  
22 change on biological diversity. There is a mosaic of genetic lineages across continental  
23 Europe, characterised by different demographic histories and natural colonisation patterns,  
24 while island populations are characterised by recent natural and human-mediated  
25 colonisations. This study has notably expanded previous findings on *S. minutus*, with a more  
26 precise statistical phylogeographic analysis of the genetic variability and structure,  
27 colonisation routes, geographical barriers and historical demography across Europe.  
28 Specifically, we provided new data from the Iberian and Balkan peninsulas, and from Central

1 and Eastern Europe (Poland, Ukraine and Russia), important for understanding postglacial  
2 events. *Sorex minutus* is not an easy species to obtain in large numbers, and the sampling  
3 described here represents a very substantial effort. However, it is a species that is unusually  
4 widespread and genetically subdivided and therefore can inform better than almost any other  
5 about the relative importance of southern and northern glacial refugia.

6

## 7 ACKNOWLEDGEMENTS

8 Specimens and species records of *Sorex minutus* were made available by several museums  
9 and we acknowledge the help of the curators from the following institutions: Département  
10 d'écologie et évolution (Université de Lausanne, Switzerland), Univerza na Primorskem and  
11 Research Centre of Koper (Slovenia), Natuurhistorisch Museum (Rotterdam, Netherlands),  
12 Dipartimento di Ecologia (Università della Calabria, Italy), Museo di Anatomia Comparata  
13 and Museo di Zoologia "La Sapienza" (Università di Roma, Italy), Natuurmuseum Brabant  
14 (Tilburg, Netherlands) and Mammal Research Institute PAS (Białowieża, Poland). We are  
15 very grateful for the tissue samples provided by Glenn Yannic, Jacques Hausser, Jan Zima,  
16 Friðja Jóhannesdóttir, Holger Bruns, Peter Borkenhagen, Natália Martínková, Elena  
17 Gladilina, Pavel Goldin and Petr Kotlík.

18

## 19 REFERENCES

- 20 **Abellán P, Svenning J-C. 2014.** Refugia within refugia – patterns in endemism and genetic  
21 divergence are linked to Late Quaternary climate stability in the Iberian Peninsula.  
22 *Biological Journal of the Linnean Society* **113**: 13-28.
- 23 **Afzal-Rafii Z, Dodd RS. 2007.** Chloroplast DNA supports a hypothesis of glacial refugia  
24 over postglacial recolonization in disjunct populations of black pine (*Pinus nigra*) in  
25 Western Europe. *Molecular Ecology* **16**: 723-736.
- 26 **Baele G, Lemey P, Vansteelandt S. 2013.** Make the most of your samples: Bayes factor  
27 estimators for high-dimensional models of sequence evolution. *BMC Bioinformatics*  
28 **14**: 85.

- 1 **Banaszek A, Ziomek J, Jadwiszczak KA, Kaczyńska E, Mirski P. 2012.** Identification of  
2 the barrier to gene flow between phylogeographic lineages of the common hamster  
3 *Cricetus cricetus*. *Acta Theriologica* **57**: 195-204.
- 4 **Bilton DT, Mirol PM, Mascheretti S, Fredga K, Zima J, Searle JB. 1998.** Mediterranean  
5 Europe as an area of endemism for small mammals rather than a source for  
6 northwards postglacial colonization. *Proceedings of the Royal Society of London*  
7 *Series B* **265**: 1219-1226.
- 8 **Bisconti R, Aloise G, Siclari A, Fava V, Provenzano M, Arduino P, Chiocchio A,**  
9 **Nascetti G, Canestrelli D. 2018.** Forest dormouse (*Dryomys nitedula*) populations in  
10 southern Italy belong to a deeply divergent evolutionary lineage: implications for  
11 taxonomy and conservation. *Hystrix* **29**: 75-79.
- 12 **Böhme MU, Fritz U, Kotenko T, Džukić G, Ljubisavljević K, Tzankov N, Berendonk TU.**  
13 **2007.** Phylogeography and cryptic variation within the *Lacerta viridis* complex  
14 (Lacertidae, Reptilia). *Zoologica Scripta* **36**: 119-131.
- 15 **Bonardi G, Cavazza W, Perrone V, Rossi S. 2001.** Calabria-Peloritani terrane and  
16 Northern Ionian Sea. In: Vai GB, Martini IP, eds. *Anatomy of an orogen: The*  
17 *Apennines and adjacent Mediterranean basins*. Dordrecht: Kluwer, 287-306.
- 18 **Bonfiglio L, Mangano G, Marra AC, Masini F, Pavia M, Petruso D. 2002.** Pleistocene  
19 Calabrian and Sicilian bioprovinces. *Geobios* **35**: 29-39.
- 20 **Bouckaert R, Heled J, Kühnert D, Vaughan T, Wu C-H, Xie D, Suchard MA, Rambaut A,**  
21 **Drummond AJ. 2014.** BEAST 2: a software platform for Bayesian evolutionary  
22 analysis. *PLOS Computational Biology* **10**: e1003537.
- 23 **Brunhoff C, Galbreath KE, Fedorov VB, Cook JA, Jaarola M. 2003.** Holarctic  
24 phylogeography of the root vole (*Microtus oeconomus*): implications for late  
25 Quaternary biogeography of high latitudes. *Molecular Ecology* **12**: 957-968.
- 26 **Buoncristiani J-F, Campy M. 2004.** Palaeogeography of the last two glacial episodes in  
27 France: the Alps and Jura. In: Ehlers J, Gibbard PL, eds. *Quaternary glaciations –*

- 1           *Extent and chronology Part I: Europe*. London: Developments in Quaternary Science  
2           **2**: 101-110.
- 3   **Bužan EV, Förster DW, Searle JB, Kryštufek B. 2010.** A new cytochrome b phylogroup of  
4           the common vole (*Microtus arvalis*) endemic to the Balkans and its implications for  
5           the evolutionary history of the species. *Biological Journal of the Linnean Society* **100**:  
6           788-796.
- 7   **Caloi L, Malatesta A, Palombo RM. 1989.** Biogeografia della Calabria meridionale durante  
8           il Quaternario. *Atti Accademia Peloritana dei Pericolanti Classe I, Scienze*  
9           *Matematiche Fisiche e Naturali* **67**: 261-278.
- 10   **Calvet M. 2004.** The Quaternary glaciation of the Pyrenees. In: Ehlers J, Gibbard PL, eds.  
11           *Quaternary glaciations – Extent and chronology Part I: Europe*. London:  
12           Developments in Quaternary Science **2**: 119-128.
- 13   **Castiglia R, Annesi F, Aloise G, Amori G. 2007.** Mitochondrial DNA reveals different  
14           phylogeographic structures in the water shrews *Neomys anomalus* and *N. fodiens*  
15           (Insectivora: Soricidae) in Europe. *Journal of Zoological Systematics and*  
16           *Evolutionary Research* **45**: 255-262.
- 17   **Churchfield S. 1990.** *The natural history of shrews*. London: Christopher Helm and A&C  
18           Black.
- 19   **Churchfield S, Searle JB. 2008.** Pygmy shrew *Sorex minutus*. In: Harris S, Yalden DW,  
20           eds. *Mammals of the British Isles: handbook*. London: The Mammal Society, 267-  
21           271.
- 22   **Clark PU, Dyke AS, Shakun JD, Carlson AE, Clark J, Wohlfarth B, Mitrovica JX,**  
23           **Hostetler SW, McCabe AM. 2009.** The Last Glacial Maximum. *Science* **325**: 710-  
24           714.
- 25   **Cook LM. 1961.** The edge effect in population genetics. *American Naturalist* **95**: 295-307.
- 26   **Darriba D, Taboada GL, Doallo R, Posada D. 2012.** jModelTest 2: more models, new  
27           heuristics and parallel computing. *Nature Methods* **9**: 772.



- 1 **Deffontaine V, Libois R, Kotlík P, Sommer R, Nieberding C, Paradis E, Searle JB,**  
2 **Michaux JR. 2005.** Beyond the Mediterranean peninsulas: evidence of central  
3 European glacial refugia for a temperate forest mammal species, the bank vole  
4 (*Clethrionomys glareolus*). *Molecular Ecology* **14**: 1727-1739.
- 5 **Diniz-Filho JAF, Soares TN, Lima JS, Dobrovolski R, Landeiro VL, de Campos Telles**  
6 **MP, Rangel TF, Bini LM. 2013.** Mantel test in population genetics. *Genetics and*  
7 *Molecular Biology* **36**: 475-485.
- 8 **Drummond AJ, Rambaut A, Shapiro B, Pybus OG. 2005.** Bayesian coalescent inference  
9 of past population dynamics from molecular sequences. *Molecular Biology and*  
10 *Evolution* **22**: 1185-1192.
- 11 **Drummond AJ, Ho SYW, Phillips MJ, Rambaut A. 2006.** Relaxed phylogenetics and  
12 dating with confidence. *PLOS Biology* **4**: e88.
- 13 **Excoffier L, Laval G, Schneider S. 2005.** Arlequin ver. 3.0: An integrated software package  
14 for population genetics data analysis. *Evolutionary Bioinformatics Online* **1**: 47-50.
- 15 **Fløjgaard C, Normand S, Skov F, Svenning J-C. 2009.** Ice age distributions of European  
16 small mammals: insights from species distribution modelling. *Journal of*  
17 *Biogeography* **36**: 1152-1163.
- 18 **Fu YX. 1997.** Statistical tests of neutrality of mutations against population growth, hitchhiking  
19 and background selection. *Genetics* **147**: 915-925.
- 20 **Fumagalli L, Taberlet P, Stewart DT, Gielly L, Hausser J, Vogel P. 1999.** Molecular  
21 phylogeny and evolution of *Sorex* shrews (Soricidae: Insectivora) inferred from  
22 mitochondrial DNA sequence data. *Molecular Phylogenetics and Evolution* **11**: 222-  
23 235.
- 24 **Gaffney V, Thomson K, Fitch S. 2007.** *Mapping Doggerland: the Mesolithic landscapes of*  
25 *the southern North Sea*. Oxford: Archaeopress.
- 26 **Gómez A, Lunt DH. 2007.** Refugia within refugia: patterns of phylogeographic concordance  
27 in the Iberian Peninsula. In: Weiss S, Ferrand N, eds. *Phylogeography of southern*  
28 *European refugia*. Dordrecht: Springer, 155-188.

- 1 **Hall TA. 1999.** BioEdit: a user-friendly biological sequence alignment editor and analysis  
2 program for Windows 95/98/NT/XP. *Nucleic Acids Symposium Series* **41**: 95-98.
- 3 **Hampe A, Petit RJ. 2005.** Conserving biodiversity under climate change: the rear edge  
4 matters. *Ecology Letters* **8**: 461-467.
- 5 **Heckel G, Burri R, Fink S, Desmet J-F, Excoffier L. 2005.** Genetic structure and  
6 colonization processes in European populations of the common vole, *Microtus*  
7 *arvalis*. *Evolution* **59**: 2231-2242.
- 8 **Hewitt GM. 2000.** The genetic legacy of the Quaternary ice ages. *Nature* **405**: 907-913.
- 9 **Hughes PD, Woodward JC, Gibbard PL. 2006.** Quaternary glacial history of the  
10 Mediterranean mountains. *Progress in Physical Geography* **30**: 334-364.
- 11 **Hutterer R. 1990.** *Sorex minutus* Linnaeus, 1766. Zwergspitzmaus. In: Niethammer J, Krapp  
12 F, eds. *Handbuch der Säugetiere Europas, band 3*. Wiesbaden: Aula-Verlag, 183-  
13 206.
- 14 **Hutterer R. 2005.** Order Soricomorpha. In: Wilson DE, Reeder DM, eds. *Mammal species of*  
15 *the world*, 3<sup>rd</sup> ed. Baltimore: Johns Hopkins University Press, 220-311.
- 16 **Hutterer R, Kryštufek B, Fernandes M, Meinig H. 2016.** *Sorex minutus* (errata version  
17 published in 2017). The IUCN Red List of Threatened Species 2016:  
18 e.T29667A115171222.[http://dx.doi.org/10.2305/IUCN.UK.2016-](http://dx.doi.org/10.2305/IUCN.UK.2016-3.RLTS.T29667A22316362.en)  
19 3.RLTS.T29667A22316362.en. Downloaded on 04 February 2019.
- 20 **Jaarola M, Searle JB. 2002.** Phylogeography of field voles (*Microtus agrestis*) in Eurasia  
21 inferred from mitochondrial DNA sequences. *Molecular Ecology* **11**: 2613-2621.
- 22 **Kass RE, Raftery AE. 1995.** Bayes factors. *Journal of the American Statistical Association*  
23 **90**: 773-795.
- 24 **Knowles LL. 2009.** Statistical phylogeography. *Annual Review of Ecology, Evolution, and*  
25 *Systematics* **40**: 593-612.
- 26 **Knowles LL, Maddison WP. 2002.** Statistical phylogeography. *Molecular Ecology* **11**: 2623-  
27 2635.

- 1 **Kotlík P, Deffontaine V, Mascheretti S, Zima J, Michaux JR, Searle JB. 2006.** A northern  
2 glacial refugium for bank voles (*Clethrionomys glareolus*). *Proceedings of the*  
3 *National Academy of Sciences of the United States of America* **103**: 14860-14864.
- 4 **Kryštufek B, Bužan EV, Hutchinson WF, Hänfling B. 2007.** Phylogeography of the rare  
5 Balkan endemic Martino's vole, *Dinaromys bogdanovi*, reveals strong differentiation  
6 within the Western Balkan Peninsula. *Molecular Ecology* **16**: 1221-1232.
- 7 **Kryštufek B, Bryja J, Bužan EV. 2009.** Mitochondrial phylogeography of the European  
8 ground squirrel, *Spermophilus citellus*, yields evidence on refugia for steppic taxa in  
9 the southern Balkans. *Heredity* **103**: 129-135.
- 10 **Larkin MA, Blackshields G, Brown NP, Chenna R, McGettigan PA, McWilliam H,**  
11 **Valentin F, Wallace IM, Wilm A, Lopez R, Thompson JD, Gibson TJ, Higgins**  
12 **DG. 2007.** Clustal W and Clustal X version 2.0. *Bioinformatics* **23**: 2947-2948.
- 13 **Librado P, Rozas J. 2009.** DnaSP v5: A software for comprehensive analysis of DNA  
14 polymorphism data. *Bioinformatics* **25**: 1451-1452.
- 15 **Magri D, Vendramin GG, Comps B, Dupanloup I, Geburek T, Gömöry D, Latałowa M,**  
16 **Litt T, Paule L, Roure JM, Tantau I, Van Der Knaap WO, Petit RJ, De Beaulieu J.**  
17 **2006.** A new scenario for the Quaternary history of European beech populations:  
18 palaeobotanical evidence and genetic consequences. *New Phytologist* **171**: 199-221.
- 19 **Malatesta A. 1985.** *Geologia e paleobiologia dell'era glaciale*. Roma: La Nuova Italia  
20 Scientifica. [In Italian]
- 21 **Manni F, Guerard E, Heyer E. 2004.** Geographic patterns of (genetic, morphologic,  
22 linguistic) variation: how barriers can be detected by using Monmonier's algorithm.  
23 *Human Biology* **76**: 173-190.
- 24 **Marková AK. 2011.** Small mammals from Palaeolithic sites of the Crimea. *Quaternary*  
25 *International* **231**: 22-27.
- 26 **McDevitt AD, Rambau RV, O'Brien J, McDevitt CD, Hayden TJ, Searle JB. 2009.** Genetic  
27 variation in Irish pygmy shrews *Sorex minutus* (Soricomorpha: Soricidae):

- 1 implications for colonization history. *Biological Journal of the Linnean Society* **97**:  
2 918-927.
- 3 **McDevitt AD, Yannic G, Rambau RV, Hayden TJ, Searle JB. 2010.** Postglacial  
4 recolonization of continental Europe by the pygmy shrew (*Sorex minutus*) inferred  
5 from mitochondrial and Y chromosomal DNA sequences. In: Habel JC, Assman T,  
6 eds. *Relict species: phylogeography and conservation biology*. Berlin: Springer  
7 Verlag, 217-236.
- 8 **McDevitt AD, Vega R, Rambau RV, Yannic G, Herman JS, Hayden TJ, Searle JB. 2011.**  
9 Colonization of Ireland: revisiting ‘the pygmy shrew syndrome’ using mitochondrial, Y  
10 chromosomal and microsatellite markers. *Heredity* **107**: 548-557.
- 11 **McDevitt AD, Zub K, Kawałko A, Olivier MK, Herman JS, Wójcik JM. 2012.** Climate and  
12 refugial origin influence mitochondrial lineage distribution of weasels (*Mustela nivalis*)  
13 in a phylogeographic suture zone. *Biological Journal of the Linnean Society* **106**: 57-  
14 69.
- 15 **McNeely JA, Miller KR, Reid WV, Mittermeier RA, Werner TB. 1990.** *Conserving the*  
16 *world's biological diversity*. Washington, DC: World Conservation Union, World  
17 Resources Institute, Conservation International, World Wildlife Fund–US, and the  
18 World Bank.
- 19 **Ohdachi SD, Hasegawa M, Iwasa MA, Vogel P, Oshida T, Lin L-K, Abe H. 2006.**  
20 Molecular phylogenetics of soricid shrews (Mammalia) based on mitochondrial  
21 cytochrome b gene sequences: with special reference to the Soricinae. *Journal of*  
22 *Zoology* **270**: 199-200.
- 23 **O'Regan HJ. 2008.** The Iberian Peninsula – corridor or cul-de-sac? Mammalian faunal  
24 change and possible routes of dispersal in the last 2 million years. *Quaternary*  
25 *Science Reviews* **27**: 2136-2144.
- 26 **Pazonyi P. 2004.** Mammalian ecosystem dynamics in the Carpathian Basin during the last  
27 27,000 years. *Palaeogeography, Palaeoclimatology, Palaeoecology* **212**: 295-314.

- 1 **Pedreschi D, García-Rodríguez O, Yannic G, Cantarello E, Diaz A, Golicher D,**  
2 **Korstjens AH, Heckel G, Searle JB, Gillingham P, Hardouin EA, Stewart JR.**  
3 **2019.** Challenging the European southern refugium hypothesis: species-specific  
4 structures versus general patterns of genetic diversity and differentiation among  
5 small mammals. *Global Ecology and Biogeography* **28**: 262-274.
- 6 **Petit RJ, Aguinagalde I, de Beaulieu JL, Bittkau C, Brewer S, Cheddadi R, Ennos R,**  
7 **Fineschi S, Grivet D, Lascoux M, Mohanty A, Müller-Starck G, Demesure-Musch**  
8 **B, Palmé A, Martín JP, Rendell S, Vendramin GG. 2003.** Glacial refugia: hotspots  
9 but not melting pots of genetic diversity. *Science* **300**: 1563-1565.
- 10 **Provan J, Bennett KD. 2008.** Phylogeographic insights into cryptic glacial refugia. *Trends in*  
11 *Ecology and Evolution* **23**: 564-571.
- 12 **Rambaut A, Drummond AJ, Xie D, Baele G, Suchard MA. 2018.** Posterior summarisation  
13 in Bayesian phylogenetics using Tracer 1.7. *Systematic Biology* **67**: 901-904.
- 14 **Ramos-Onsins SE, Rozas J. 2002.** Statistical properties of new neutrality tests against  
15 population growth. *Molecular Biology and Evolution* **19**: 2092-2100.
- 16 **Reuther AU, Urdea P, Geiger C, Ivy-Ochs S, Niller H-P, Kubik PW, Heine K. 2007.** Late  
17 Pleistocene glacial chronology of the Pietrele Valley, Retezat Mountains, Southern  
18 Carpathians constrained by <sup>10</sup>Be exposure ages and pedological investigations.  
19 *Quaternary International* **164-165**: 151-169.
- 20 **Rogers AR, Harpending H. 1992.** Population growth makes waves in the distribution of  
21 pairwise genetic differences. *Molecular Biology and Evolution* **9**: 552-569.
- 22 **Ronquist F, Teslenko M, van der Mark P, Ayres D, Darling A, Höhna S, Larget B, Liu L,**  
23 **Suchard MA, Huelsenbeck JP. 2012.** MrBayes 3.2: efficient Bayesian phylogenetic  
24 inference and model choice across a large model space. *Systematic Biology* **61**: 539-  
25 542.
- 26 **Rzebik-Kowalska B. 1998.** Fossil history of shrews in Europe. In: Wójcik J, Wolsan M, eds.  
27 *Evolution of shrews*. Białowieża: Mammal Research Institute, Polish Academy of  
28 Sciences, 23-71.

- 1 **Schenekar T, Weiss S. 2011.** High rate of calculation errors in mismatch distribution  
2 analysis results in numerous false inferences of biological importance. *Heredity* **107**:  
3 511-512.
- 4 **Searle JB, Kotlík P, Rambau RV, Marková S, Herman JS, McDevitt AD. 2009.** The Celtic  
5 fringe of Britain: insights from small mammal phylogeography. *Proceedings of the*  
6 *Royal Society Series B* **276**: 4287-4294.
- 7 **Senczuk G, Colangelo P, De Simone E, Aloise G, Castiglia R. 2017.** A combination of  
8 long term fragmentation and glacial persistence drove the evolutionary history of the  
9 Italian wall lizard *Podarcis siculus*. *BMC Evolutionary Biology* **17**: 6.
- 10 **Sikes RS, Gannon WL; the Animal Care and Use Committee of the American Society**  
11 **of Mammalogists. 2011.** Guidelines of the American Society of Mammalogists for  
12 the use of wild mammals in research. *Journal of Mammalogy* **92**: 235–253.
- 13 **Slatkin M. 1995.** A measure of population subdivision based on microsatellite allele  
14 frequencies. *Genetics* **139**: 457-462.
- 15 **Sommer RS, Nadachowski A. 2006.** Glacial refugia of mammals in Europe: evidence from  
16 fossil records. *Mammal Review* **36**: 251-265.
- 17 **Steinfartz S, Veith M, Tautz D. 2000.** Mitochondrial sequence analysis of *Salamandra* taxa  
18 suggests old splits of major lineages and postglacial recolonizations of Central  
19 Europe from distinct source populations of *Salamandra salamandra*. *Molecular*  
20 *Ecology* **9**: 397-410.
- 21 **Stewart JR, Lister AM. 2001.** Cryptic northern refugia and the origins of the modern biota.  
22 *Trends in Ecology and Evolution* **16**: 608-613.
- 23 **Stewart JR, Lister AM, Barnes I, Dalén L. 2009.** Refugia revisited: individualistic  
24 responses of species in space and time. *Proceedings of the Royal Society Series B*  
25 **277**: 661-671.
- 26 **Stojak J, McDevitt AD, Herman JS, Searle JB, Wójcik JM. 2015.** Post-glacial colonization  
27 of eastern Europe from the Carpathian refugium: evidence from mitochondrial DNA

- 1 of the common vole *Microtus arvalis*. *Biological Journal of the Linnean Society* **115**:  
2 927-939.
- 3 **Stojak J, McDevitt AD, Herman JS, Kryštufek B, Uhlíková J, Purger JJ, Lavrenchenko**  
4 **LA, Searle JB, Wójcik JM. 2016.** Between the Balkans and the Baltic:  
5 phylogeography of a common vole mitochondrial DNA lineage limited to Central  
6 Europe. *PLoS ONE* **11**: e0168621.
- 7 **Stojak J, Borowik T, Górny M, McDevitt AD, Wójcik JM. 2019.** Climatic influences on the  
8 genetic structure and distribution of the common vole and field vole in Europe.  
9 *Mammal Research* **64**: 19-29.
- 10 **Stojak J, Tarnowska E. 2019.** Polish suture zone as the goblet of truth in post-glacial  
11 history of mammals in Europe. *Mammal Research* **64**: 463-475.
- 12 **Taberlet P, Fumagalli L, Wust-Saucy AG, Cosson JF. 1998.** Comparative  
13 phylogeography and postglacial colonization routes in Europe. *Molecular Ecology* **7**:  
14 453-464.
- 15 **Tzedakis PC, Emerson BC, Hewitt GM. 2013.** Cryptic or mystic? Glacial tree refugia in  
16 northern Europe. *Trends in Ecology and Evolution* **28**: 696-704.
- 17 **Vega R, Amori G, Aloise G, Cellini S, Loy A, Searle JB. 2010.** Genetic and morphological  
18 variation in a Mediterranean glacial refugium: evidence from Italian pygmy shrews,  
19 *Sorex minutus* (Mammalia: Soricomorpha). *Biological Journal of the Linnean Society*  
20 **100**: 774-787.
- 21 **Vega R, Fløjgaard C, Lira-Noriega C, Nakazawa Y, Svenning J-C, Searle JB. 2010.**  
22 Northern glacial refugia for the pygmy shrew *Sorex minutus* in Europe revealed by  
23 phylogeographic analyses and species distribution modelling. *Ecography* **33**: 260-  
24 271.
- 25 **Willis KJ, van Andel TH. 2004.** Trees or no trees? The environments of central and eastern  
26 Europe during the Last Glaciation. *Quaternary Science Reviews* **23**: 2369-2387.
- 27 **Willis KJ, Rudner E, Sümegei P. 2000.** The full-glacial forests of central and southeastern  
28 Europe. *Quaternary Research* **53**: 203-213.

- 1 **Wójcik JM, Kawałko A, Marková S, Searle JB, Kotlík P. 2010.** Phylogeographic  
2 signatures of northward post-glacial colonization from high-latitude refugia: a case  
3 study of bank voles using museum specimens. *Journal of Zoology* **281**: 249-262.
- 4 **Yannic G, Basset P, Hausser J. 2008.** A new perspective on the evolutionary history of  
5 western European *Sorex araneus* group revealed by paternal and maternal  
6 molecular markers. *Molecular Phylogenetics and Evolution* **47**: 237-250.
- 7 **Zagorodniuk I. 1996.** Rare shrew species in the territory of Ukraine: legends, facts and  
8 diagnostics. *Zoology Bulletin* **30**: 53-69. [In Russian]
- 9 **Zaitsev MV, Voyta LL, Sheftel BI. 2014.** *The mammals of Russia and adjacent territories.*  
10 *Lipotyphlans*. Saint Petersburg: Nauka. [In Russian]
- 11



1 SUPPORTING INFORMATION

2

3 **Table S1.** *Sorex minutus* dataset and sample information

4 **Table S2.** Pairwise geographic distances (in Km, below diagonal) and genetic differentiation

5 (Slatkin's  $F_{ST}$ , above diagonal) among *Sorex minutus* phylogroups and other geographic

6 groups

7 **Figure S1.** Correlogram of pairwise geographic and genetic distances among *Sorex minutus*

8 phylogroups and other geographic groups.

9 **Figure S2.** Mismatch distributions of *Sorex minutus* phylogroups and other geographic

10 groups.

11

## 1 TABLES

2

3

**Table 1.** DNA sequence polymorphism in *Sorex minutus* phylogroups and other geographic groups

| Phylogroups            | N   | S   | P   | H   | Hd     | Hd (SD) | $\pi$  | $\pi$ (SD) | k       |
|------------------------|-----|-----|-----|-----|--------|---------|--------|------------|---------|
| Ingroup                | 671 | 390 | 277 | 424 | 0.9899 | 0.0015  | 0.0143 | 0.0000     | 15.8670 |
| Italian                | 26  | 51  | 19  | 18  | 0.9600 | 0.0230  | 0.0061 | 0.0004     | 6.7720  |
| South Italian          | 4   | 16  | 0   | 4   | 1.0000 | 0.1770  | 0.0072 | 0.0020     | 8.0000  |
| Balkan                 | 22  | 55  | 28  | 17  | 0.9610 | 0.0290  | 0.0097 | 0.0009     | 10.7970 |
| Iberian                | 6   | 15  | 6   | 5   | 0.9330 | 0.1220  | 0.0058 | 0.0013     | 6.4000  |
| Western                | 283 | 147 | 83  | 102 | 0.9458 | 0.0067  | 0.0049 | 0.0002     | 5.4400  |
| Irish                  | 94  | 53  | 21  | 42  | 0.8920 | 0.0270  | 0.0020 | 0.0002     | 2.2180  |
| Northern               | 330 | 311 | 197 | 278 | 0.9984 | 0.0005  | 0.0065 | 0.0002     | 7.1840  |
| Continental groups     |     |     |     |     |        |         |        |            |         |
| Western (Continental)  | 15  | 28  | 11  | 13  | 0.9810 | 0.0310  | 0.0050 | 0.0006     | 5.5430  |
| Northern (Continental) | 226 | 241 | 142 | 188 | 0.9978 | 0.0007  | 0.0062 | 0.0002     | 6.9300  |
| Other island groups    |     |     |     |     |        |         |        |            |         |
| Orkney Islands (All)   | 119 | 17  | 13  | 11  | 0.7720 | 0.0210  | 0.0027 | 0.0001     | 3.0140  |
| Orkney Mainland        | 44  | 9   | 7   | 8   | 0.7550 | 0.0550  | 0.0013 | 0.0002     | 1.4790  |
| Orkney South Ronaldsay | 40  | 1   | 1   | 2   | 0.1420 | 0.0710  | 0.0001 | 0.0001     | 0.1420  |
| Orkney Westray         | 33  | 0   | 0   | 1   | 0.0000 | 0.0000  | 0.0000 | 0.0000     | 0.0000  |
| Orkney Hoy             | 2   | 2   | 0   | 2   | 1.0000 | 0.5000  | 0.0018 | 0.0009     | 2.0000  |
| Belle Île              | 5   | 9   | 3   | 5   | 1.0000 | 0.1260  | 0.0038 | 0.0010     | 4.2000  |
| British                | 91  | 146 | 61  | 80  | 0.9960 | 0.0030  | 0.0055 | 0.0003     | 6.1210  |

N = Sample size; S = Number of polymorphic (segregating) sites; P = Parsimony informative sites; H = Number of haplotypes; Hd = Haplotype diversity; SD = Standard Deviation;  $\pi$  = Nucleotide diversity; k = Average number of nucleotide differences.

4

1

**Table 2.** Population expansion tests for *Sorex minutus* phylogroups and other geographic groups

| Phylogroups            | R <sub>2</sub> | P-value       | F <sub>s</sub> | P-value       | τ      | t<br>(in years) | TMRCA<br>(in KYA) | 95% HPD<br>(in KYA) |
|------------------------|----------------|---------------|----------------|---------------|--------|-----------------|-------------------|---------------------|
| Ingroup                | 0.0198         | <b>0.0004</b> | -741.2620      | ***           | 7.8590 | 6425            | 83.4              | 59.7-110.2          |
| Italian                | 0.0521         | <b>0.0000</b> | -5.8766        | <b>0.0152</b> | 6.7720 | 5536            | 15.3              | 10.7-21.5           |
| South Italian          | 0.1822         | 0.1658        | 0.0687         | 0.2975        | 5.6340 | -               | 12.8              | 8.5-17.8            |
| Balkan                 | 0.0830         | 0.0542        | -3.6701        | 0.0768        | 7.1500 | -               | 29.6              | 21.8-40.5           |
| Iberian                | 0.1462         | 0.0888        | 0.0731         | 0.4290        | 4.0100 | -               | 31.8              | 22.0-43.1           |
| Western                | 0.0175         | <b>0.0004</b> | -114.6990      | ***           | 3.6660 | 2997            | 24.1              | 16.4-33.1           |
| Irish                  | 0.0187         | <b>0.0000</b> | -52.5664       | ***           | 1.3040 | 1066            | 5.9               | 4.9-6.9             |
| Northern               | 0.0105         | <b>0.0000</b> | -663.4730      | ***           | 6.5390 | 5346            | 24.1              | 16.4-33.1           |
| Continental groups     |                |               |                |               |        |                 |                   |                     |
| Western (Continental)  | 0.0793         | <b>0.0045</b> | -6.0342        | <b>0.0035</b> | 5.5430 | 4532            | -                 | -                   |
| Northern (Continental) | 0.0128         | <b>0.0000</b> | -386.4520      | ***           | 5.8010 | 4742            | -                 | -                   |
| Other island groups    |                |               |                |               |        |                 |                   |                     |
| Orkney Islands (All)   | 0.0880         | 0.5209        | 0.6044         | 0.6437        | 1.1740 | -               | -                 | -                   |
| Orkney Mainland        | 0.0839         | 0.2301        | -1.6879        | 0.1892        | 1.4790 | -               | -                 | -                   |
| Orkney Hoy             | 0.5000         | 1.0000        | NC             | NC            | 2.0000 | -               | -                 | -                   |
| Orkney South Ronaldsay | 0.0712         | 0.1770        | -0.2182        | 0.4420        | 0.1420 | -               | -                 | -                   |
| Orkney Westray         | NC             | NC            | NC             | NC            | NC     | -               | -                 | -                   |
| Belle Île              | 0.1915         | 0.2467        | -1.6330        | 0.0732        | 3.5500 | -               | -                 | -                   |
| British                | 0.0161         | <b>0.0000</b> | -122.8550      | ***           | 6.1210 | 5004            | -                 | -                   |

R<sub>2</sub> = Ramos-Onsins and Rozas (2002) test of neutrality; P-value = P-values of expansion tests expected under neutrality (\*\*\*) = P < 0.001); F<sub>s</sub> = Demographic population expansion test (Fu 1997); τ = (2ut) The mode of a mismatch distribution; t = Time of population expansion (for phylogroups with bi- or unimodal mismatch distributions); TMRCA = Time of divergence from the Most Recent Common Ancestor; 95% HPD = 95% Highest Posterior Density; KYA = Thousand Years Ago; NC = Not computable (not enough variation or samples)

2

3

1 FIGURE LEGENDS

2

3 **Figure 1.** A) Map of Eurasia showing the geographical distribution of the Eurasian pygmy  
4 shrew *Sorex minutus* (Hutterer *et al.*, 2016). B) Sample localities of *S. minutus* used for this  
5 study and divided into cytochrome (cyt) b phylogroups (symbols with a dot represent  
6 samples used for inferring geographic barriers). C) Geographic barriers (red lines) for *S.*  
7 *minutus*; the barriers (up to a maximum of 10) were inferred using Monmonier's maximum  
8 difference algorithm which finds edges (boundaries) on the Voronoi tessellation (blue  
9 polygons) associated with the highest rate of change in genetic distances among a subset of  
10 continental samples (dots) interconnected with a Delaunay triangulation (green lines).

11

12 **Figure 2.** Phylogenetic reconstructions of the Eurasian pygmy shrew *Sorex minutus* using  
13 cyt b sequences. A) Bayesian phylogenetic tree (with posterior probabilities on branches)  
14 showing the phylogroups. B) Haplotype phylogenetic network with haplotypes represented  
15 as nodes and their evolutionary relationships represented by edges; relevant haplotypes  
16 named at the centre of star-like patterns.

17

18 **Figure 3.** Time of divergence from the Most Recent Common Ancestor (TMRCA) for the  
19 main phylogroups. Numbers on nodes represent posterior probabilities, and horizontal bars  
20 represent the 95% Highest Posterior Density (HPD). Dates in Thousand Years Ago (KYA).

21

22 **Figure 4.** Historical demography of the Eurasian pygmy shrew *Sorex minutus*. A) Mismatch  
23 distributions of groups with significant signatures of population expansion. B) Bayesian  
24 Skyline Plots (BSP) of phylogroups with significant signatures of population expansion. The  
25 solid lines in BSP are median estimates and the shaded areas represent 95% Highest  
26 Probability Densities (confidence intervals).

27

28

1 FIGURES

2

3 **Figure 1.**

4

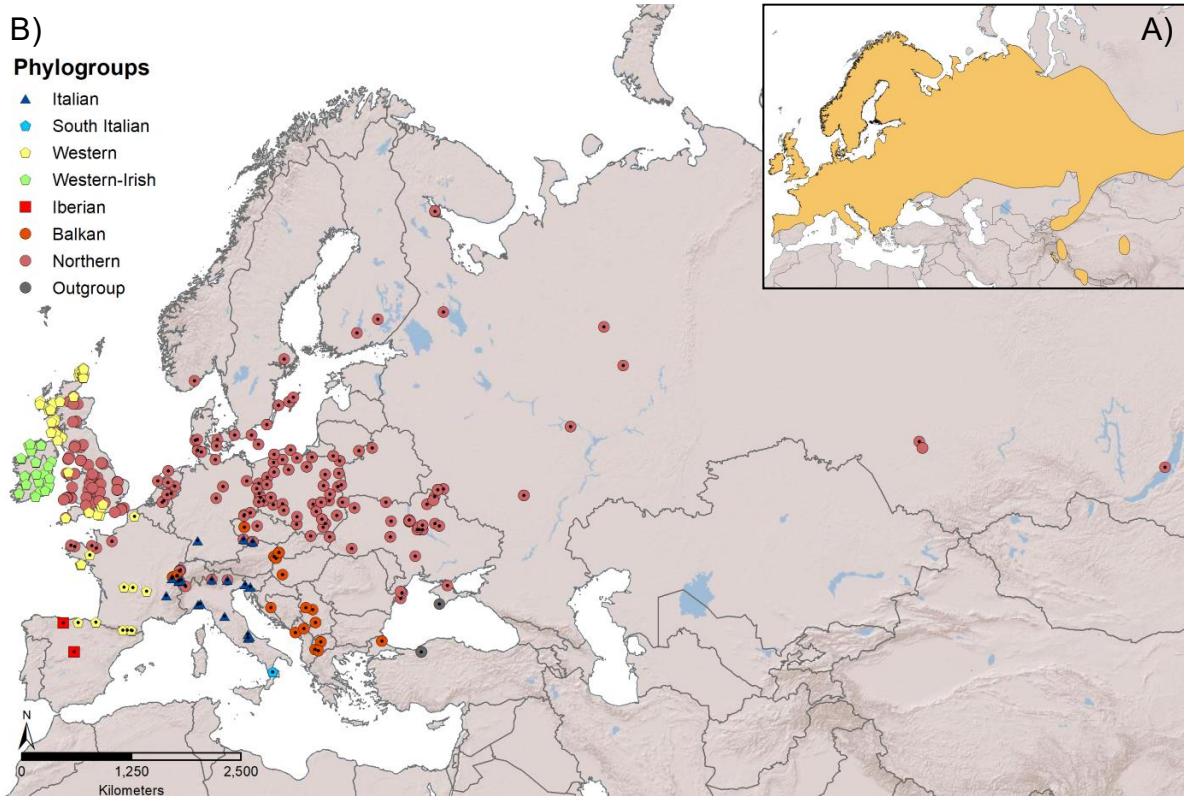

16

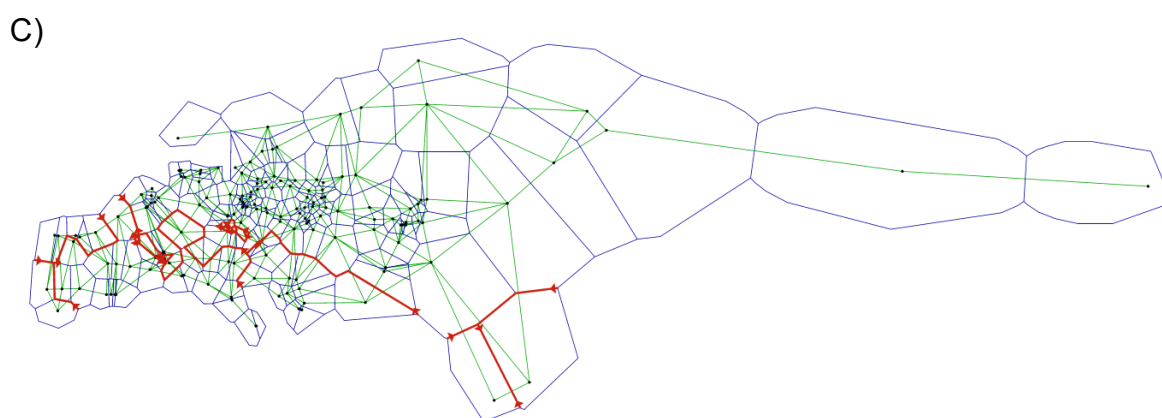

23

24

25

1 **Figure 2.**

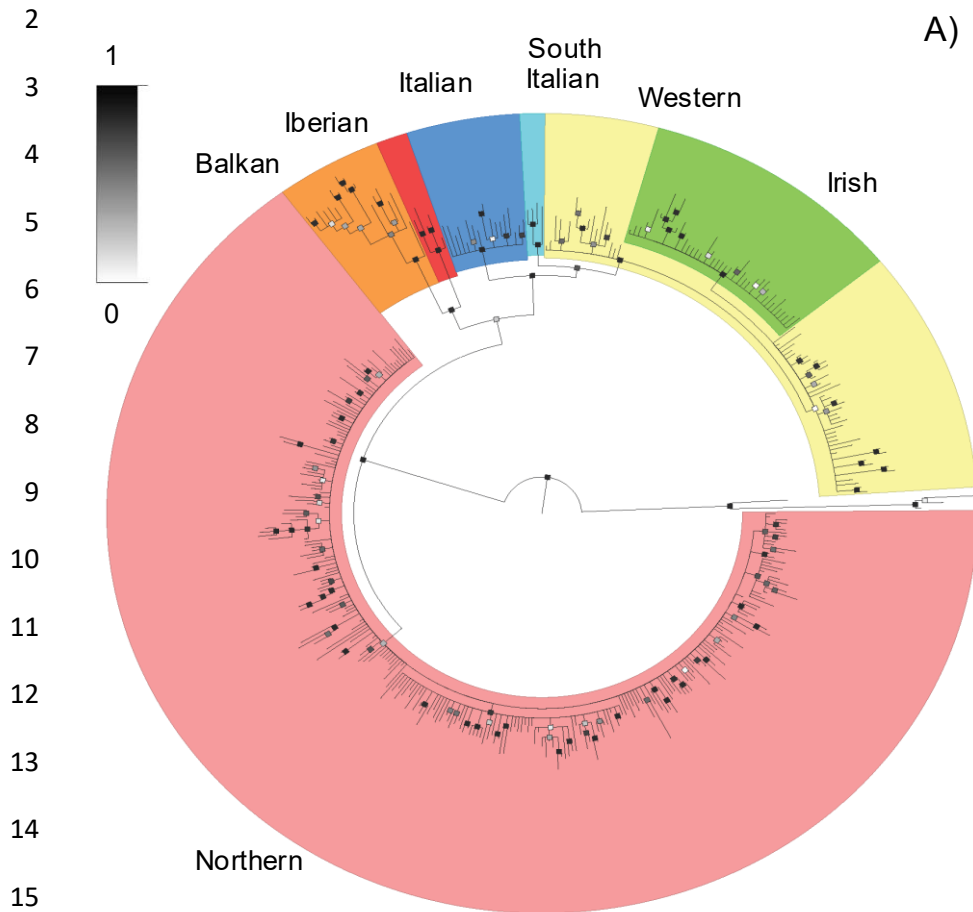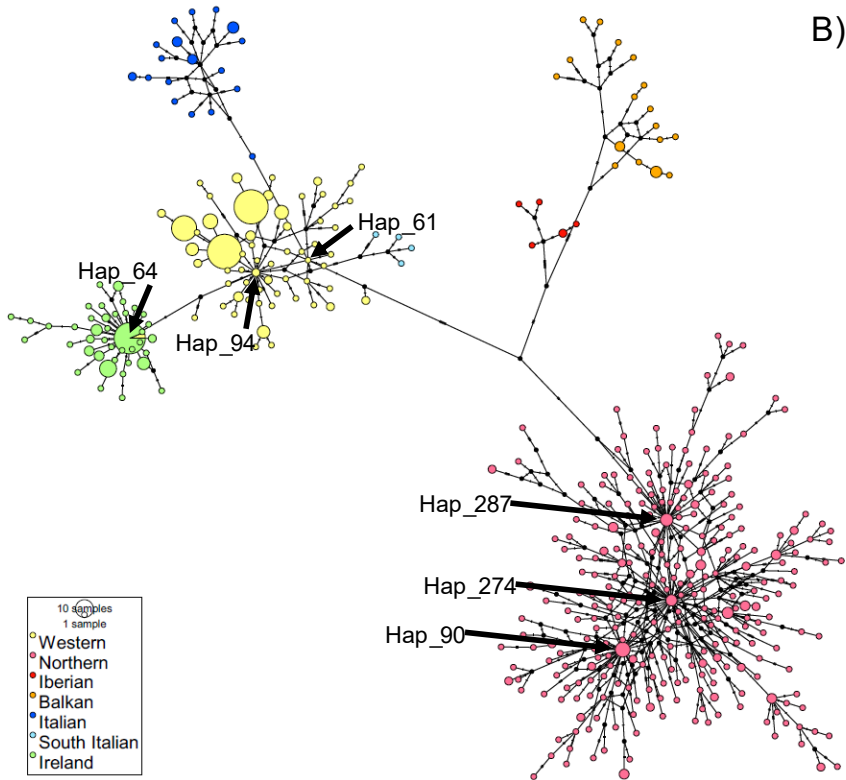

1 **Figure 3.**

2

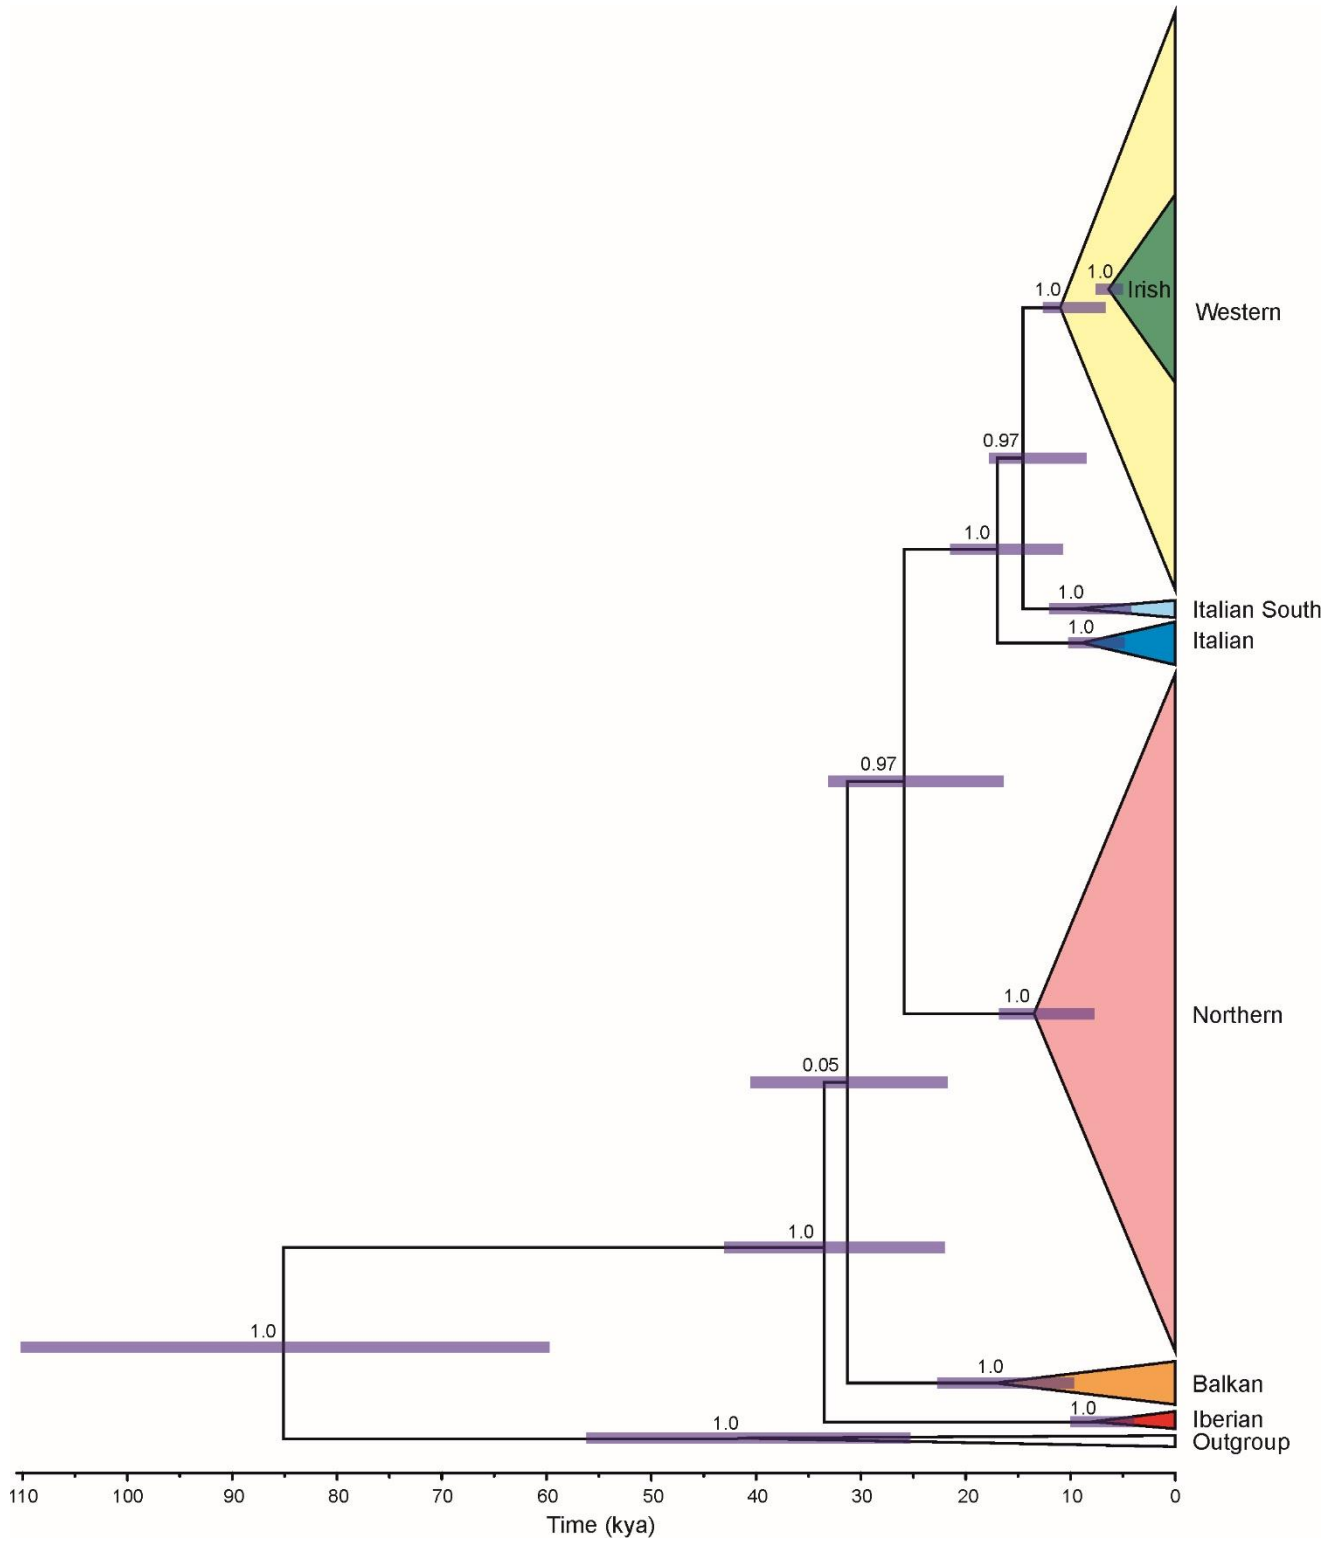

1 **Figure 4.**

2 **A)**

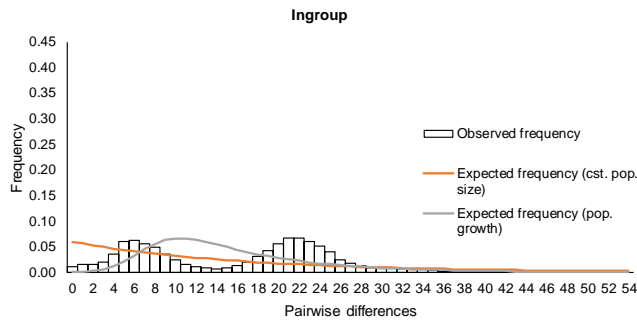

8 **Italian**

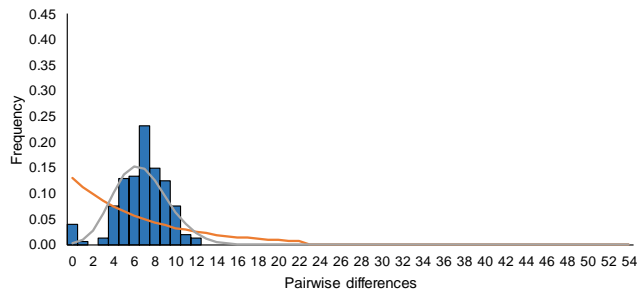

12 **Western**

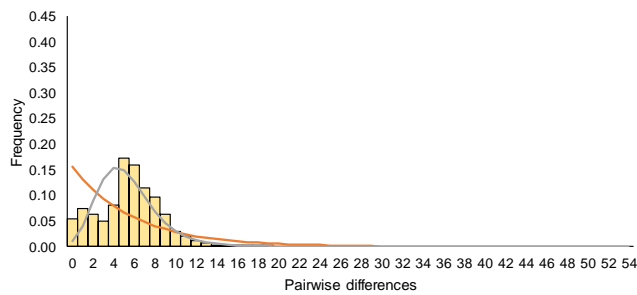

16 **Irish**

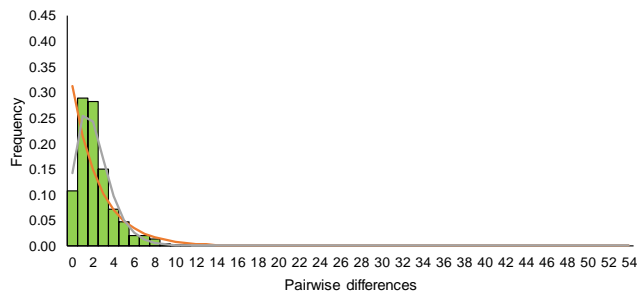

20 **Northern**

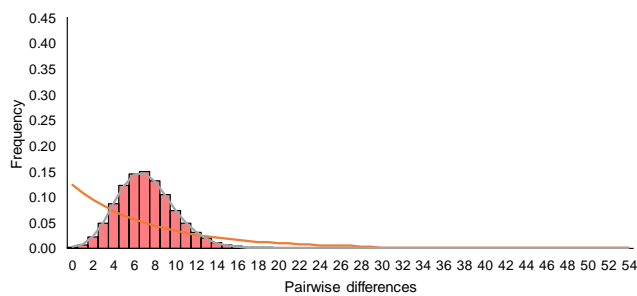

24 **B)**

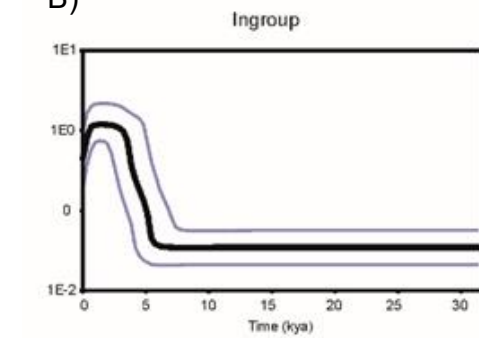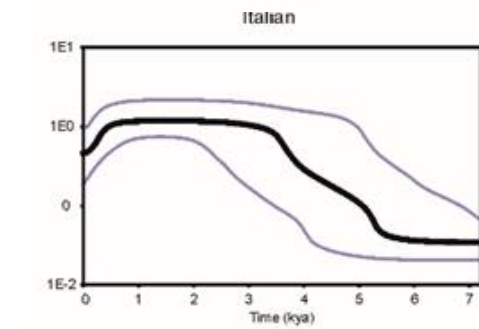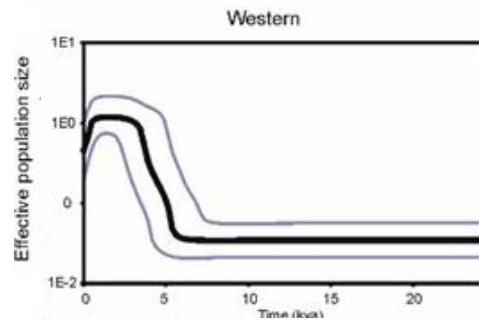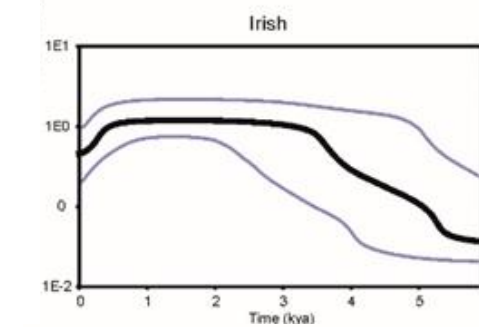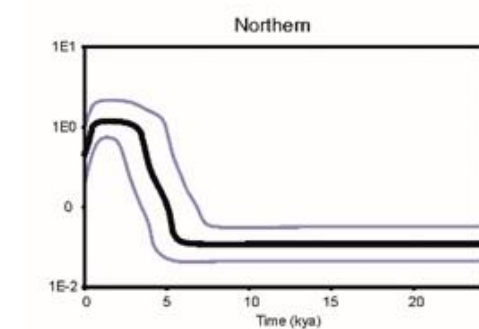



1 SUPPORTING INFORMATION

2

3 **Table S1.** *Sorex minutus* dataset and sample information

4

1

**Table S2.** Pairwise geographic distances (in Km, below diagonal) and genetic differentiation (Slatkin's  $F_{ST}$ , above diagonal) among *Sorex minutus* phylogroups and other geographic groups

|                        | Italian | South Italian | Balkan  | Iberian | Belle Île | Britain | Northern (Continental) | Western (Continental) | Orkney Islands | Irish   |
|------------------------|---------|---------------|---------|---------|-----------|---------|------------------------|-----------------------|----------------|---------|
| Italian                | -       | 1.6558        | 3.0387  | 3.6919  | 1.5940    | 2.8852  | 2.3798                 | 1.4534                | 2.8673         | 4.0090  |
| South Italian          | 773.14  | -             | 2.5113  | 3.3869  | 1.3569    | 2.8562  | 2.3204                 | 1.1713                | 2.7079         | 4.6820  |
| Balkan                 | 547.27  | 628.96        | -       | 1.9234  | 2.5617    | 3.1494  | 2.8093                 | 2.7975                | 6.2456         | 7.0533  |
| Iberian                | 1349.26 | 1768.56       | 1880.98 | -       | 4.2650    | 3.1850  | 2.6191                 | 3.8498                | 7.3804         | 10.8797 |
| Belle Ile              | 1162.82 | 1815.47       | 1701.44 | 640.58  | -         | 2.7595  | 2.1790                 | 0.3345                | 1.2148         | 2.4003  |
| Britain                | 1347.34 | 2108.66       | 1795.12 | 1286.79 | 647.11    | -       | 0.1449                 | 2.6083                | 3.9225         | 4.7265  |
| Northern (Continental) | 1022.36 | 1488.84       | 863.37  | 2218.78 | 1788.28   | 1554.91 | -                      | 2.0767                | 2.7910         | 3.2035  |
| Western (Continental)  | 903.90  | 1444.78       | 1448.34 | 476.18  | 434.81    | 1006.85 | 1742.75                | -                     | 0.5436         | 1.1193  |
| Orkney Islands         | 3476.34 | 3693.42       | 3127.67 | 4679.14 | 4175.54   | 3739.02 | 2477.61                | 4206.50               | -              | 1.4635  |
| Irish                  | 1652.35 | 2396.73       | 2124.06 | 1311.98 | 726.86    | 346.14  | 1897.29                | 1151.96               | 4016.56        | -       |

2

- 1 **Figure S1.** Correlogram of pairwise geographic and genetic distances among *Sorex minutus*
- 2 phylogroups and other geographic groups.

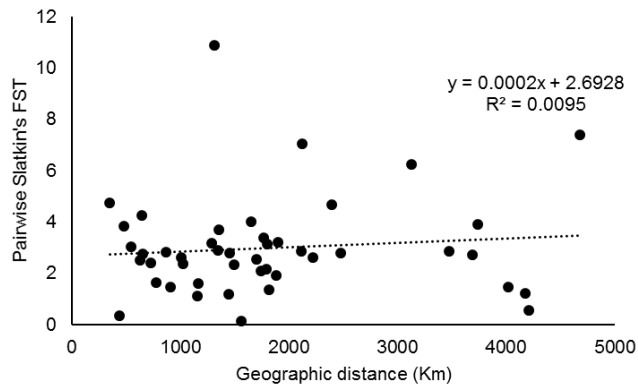

3

1 **Figure S2.** Mismatch distributions of *Sorex minutus* phylogroups and other geographic  
2 groups.

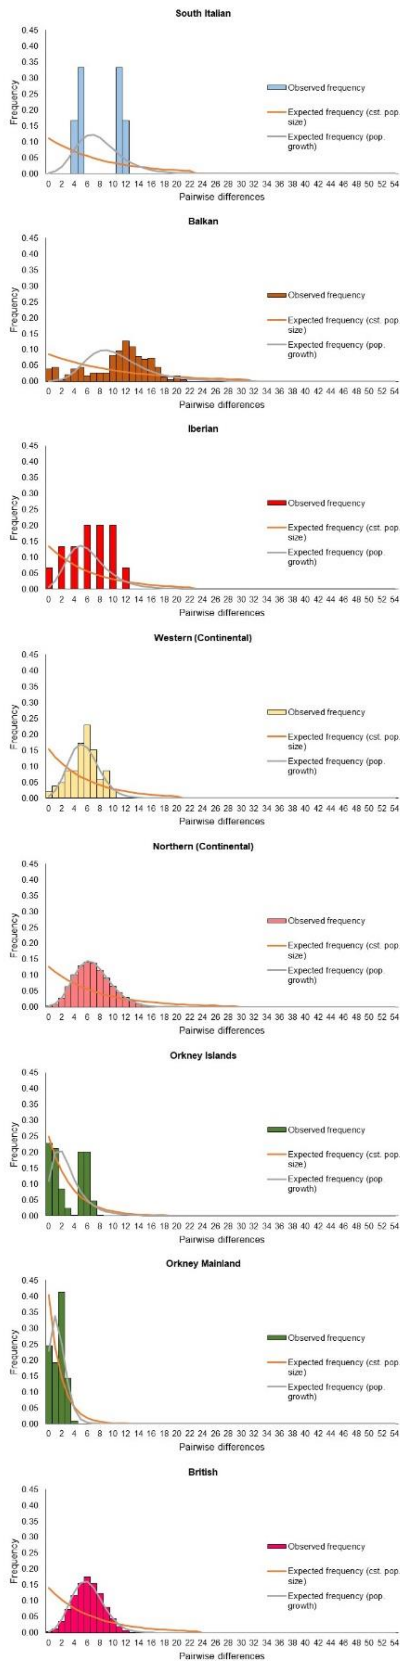

3
